# Supplementary material
Source: ML conference proceedings conference paper supplement (https://proceedings.neurips.cc/paper_files/paper/2019/hash/6aadca7bd86c4743e6724f9607256126-Abstract.html)
Supplement: Supplementary file [file 6aadca7bd86c4743e6724f9607256126-Supplemental.zip]

---

# Contextual Bandits With Cross-Learning

---

Anonymous Author(s)

Affiliation

Address

email

## Abstract

1 In the classical contextual bandits problem, in each round  $t$ , a learner observes  
2 some context  $c$ , chooses some action  $a$  to perform, and receives some reward  
3  $r_{a,t}(c)$ . We consider the variant of this problem where in addition to receiving the  
4 reward  $r_{a,t}(c)$ , the learner also learns the values of  $r_{a,t}(c')$  for all other contexts  
5  $c'$ ; i.e., the rewards that would have been achieved by performing that action under  
6 different contexts. This variant arises in several strategic settings, such as learning  
7 how to bid in non-truthful repeated auctions, which has gained a lot of attention  
8 lately as many platforms have switched to running first-price auctions. We call this  
9 problem the contextual bandits problem with cross-learning. The best algorithms  
10 for the classical contextual bandits problem achieve  $\tilde{O}(\sqrt{CKT})$  regret against all  
11 stationary policies, where  $C$  is the number of contexts,  $K$  the number of actions,  
12 and  $T$  the number of rounds. We demonstrate algorithms for the contextual bandits  
13 problem with cross-learning that remove the dependence on  $C$  and achieve regret  
14  $\tilde{O}(\sqrt{KT})$ . We simulate our algorithms on real auction data from an ad exchange  
15 running first-price auctions (showing that they outperform traditional contextual  
16 bandit algorithms).

## 17 1 Introduction

18 In the contextual bandits problem, a learner repeatedly observes some context, takes some action  
19 depending on that context, and receives some reward depending on that context. The learner's goal is  
20 to maximize their total reward over some number of rounds. The contextual bandits problem is a  
21 fundamental problem in online learning: it is a simplified (yet analyzable) variant of reinforcement  
22 learning and it captures a large class of repeated decision problems. In addition, the algorithms  
23 developed for the contextual bandits problem have been successfully applied in domains like ad  
24 placement, news recommendation, and clinical trials [14, 19, 26].

25 Ideally, one would like an algorithm for the contextual bandits problem which performs approximately  
26 as well as the best stationary strategy (i.e., the best fixed mapping from contexts to actions). This can  
27 be accomplished by running a separate instance of some low-regret algorithm for the non-contextual  
28 bandits problem (e.g. EXP3) for every context. This algorithm achieves regret  $\tilde{O}(\sqrt{CKT})$  where  $C$   
29 is the number of contexts,  $K$  the number of actions, and  $T$  the number of rounds. This bound can  
30 be shown to be tight [7]. Since the number of contexts can be very large, these algorithms can be  
31 impractical to use, and much modern current research on the contextual bandits problem instead aims  
32 to achieve low regret with respect to some smaller set of policies [4, 18, 5].

33 However, some settings possess additional structure between the rewards and contexts which allow  
34 one to achieve less than  $\tilde{O}(\sqrt{CKT})$  regret while still competing with the best stationary strategy.  
35 In this paper, we look at a specific type of structure we call *cross-learning between contexts* that is  
36 particularly common in strategic settings. In variants of the contextual bandits problem with this  
37 structure, playing an action  $a$  in some context  $c$  at round  $t$  not only reveals the reward  $r_{a,t}(c)$  of

38 playing this action in this context (which the learner receives), but also reveals to the learner the  
 39 rewards  $r_{a,t}(c')$  for every other context  $c'$ . Some settings where this structure appears include:

- 40 • **Bidding in nontruthful auctions:** Consider a bidder trying to learn how to bid in a  
 41 repeated non-truthful auction (such as a first-price auction). Every round, the bidder receives  
 42 a (private) value for the current item, and based on this must submit a bid for the item. The  
 43 auctioneer then collects the bids from all participants, and decides whether to allocate the  
 44 item to our bidder, and if so, how much to charge the bidder.

45 This can be seen as a contextual bandits problem for the bidder where the context  $c$  is the  
 46 bidder's value for the item, the action  $a$  is their bid, and their reward is their net utility from  
 47 the auction: 0 if they do not win, and their value for the item minus their payment  $p$  if they  
 48 do win. Note that this problem also allows for cross-learning between contexts – the net  
 49 utility  $r_{a,t}(c')$  that would have been received if they had value  $c'$  instead of value  $c$  is just  
 50  $(c' - p) \cdot \mathbb{1}(\text{win item})$ , which is computable from the outcome of the auction.

51 The problem of bidding in nontruthful auctions has gained a lot of attention recently as many  
 52 online advertising platforms have recently switched from running second-price to first-price  
 53 auctions. Many online publishers have adopted header bidding, in which publishers offer  
 54 impressions to multiple ad exchanges simultaneously using a first-price auction, rather than  
 55 offering impressions sequentially to different exchanges in a waterfall fashion. Additionally,  
 56 some major ad exchanges have adopted first-price auctions to sell all their inventory.<sup>1</sup> In  
 57 a first-price auction, the highest bidder is the winner and pays their bid (as opposed to  
 58 second-price auctions where the winner pays the second highest-bid). First-price auctions  
 59 are nontruthful mechanisms as bidders have incentives to shade bids so that they enjoy a  
 60 positive utility when they win [25].

- 61 • **Multi-armed bandits with exogenous costs:** Consider a multi-armed bandit problem  
 62 where at the beginning of each round  $t$ , a cost  $s_{i,t}$  of playing arm  $i$  at this round is publicly  
 63 announced. That is, choosing arm  $i$  this round results in a net reward of  $r_{i,t} - s_{i,t}$ . This  
 64 captures settings where, for example, a buyer must choose every round to buy one of  $K$   
 65 substitutable goods – he is aware of the price of each good (which might change from round  
 66 to round) but must learn over time the utility each type of good brings him.

67 This is a contextual bandits problem where the context in round  $t$  is the  $K$  costs  $s_{i,t}$  at this  
 68 time. Cross-learning between contexts is present in this setting: given the net utility of  
 69 playing action  $i$  with a given up-front cost  $s_i$ , one can infer the net utility of playing  $i$  with  
 70 any other up-front cost  $s'_i$ .

- 71 • **Dynamic pricing with variable cost:** Consider a dynamic pricing problem where a firm  
 72 offers a service (or sells a product) to a stream of customers who arrive sequentially over  
 73 time. Consumer have private and independent willingness-to-pay and the cost of serving a  
 74 customer is exogenously given and customer dependent. After observing the cost, the firm  
 75 decides on what price to offer to the consumer who decides whether to accept the service  
 76 at the offered price. The optimal price for each consumer is contingent in the cost; for  
 77 example, when demand is relatively inelastic consumers that are more costly to serve should  
 78 be quoted higher prices. This extends dynamic pricing problems to cases where the firm has  
 79 exogenous costs (see, e.g., [9] for an overview of dynamic pricing problems).

80 This is a special case of the multi-armed bandits with exogenous costs problem, and hence  
 81 an instance of contextual-bandits with cross-learning.

- 82 • **Sleeping bandits:** Consider the following variant of “sleeping bandits”, where there are  
 83  $K$  arms and in each round some subset  $S_t$  of these arms are awake. The learner can play  
 84 any arm and observe its reward, but only receives this reward if they play an awake arm.  
 85 This problem was originally proposed in [16], where one of the motivating applications is  
 86 ecommerce settings where not all sellers or items (and hence “arms”) might be available  
 87 every round.

88 This is a contextual bandits problem where the context is the set  $S_t$  of awake arms. Again,  
 89 cross-learning between contexts is present in this setting: given the observation of the reward  
 90 of arm  $i$ , one can infer the received reward for any context  $S'_t$  by just checking whether  
 91  $i \in S'_t$ .

<sup>1</sup>See <https://www.blog.google/products/admanager/simplifying-programmatic-first-price-auctions-google-ad-manager/>

92 • **Repeated Bayesian games with private types:** Consider a player participating in a  
 93 repeated Bayesian game with private, independent types. Each round the player receives  
 94 some type for the current game, performs some action, and receives some utility (which  
 95 depends on their type, their action, and the other players' actions). Again, this can be viewed  
 96 as a contextual bandit problem where types are contexts, actions are actions, and utilities are  
 97 rewards, and once again this problem allows for cross-learning between contexts (as long as  
 98 the player can compute their utility based on their type and all players' actions).

99 Note that in many of these settings, the number of possible contexts  $C$  can be huge: exponential  
 100 in  $K$  or uncountably infinite. This makes the naive  $O(\sqrt{CKT})$ -regret algorithm undesirable in  
 101 these settings. We show that in contextual bandits problems with cross-learning, it is possible to  
 102 design algorithms which completely remove the dependence on the number of contexts  $C$  in their  
 103 regret bound. We consider both settings where the contexts are generated stochastically (from some  
 104 distribution  $\mathcal{D}$  that may or may not be known to the learner) and settings where the contexts are chosen  
 105 adversarially. Similarly, we also consider settings where the rewards are generated stochastically and  
 106 settings where they are chosen adversarially. Our results include:

- 107 • **Stochastic rewards, stochastic or adversarial contexts:** We design an algorithm called  
 108 algorithm UCB1.CL with regret of  $\tilde{O}(\sqrt{KT})$ .
- 109 • **Adversarial rewards, stochastic contexts with known distribution:** We design an algo-  
 110 rithm called EXP3.CL with regret of  $\tilde{O}(\sqrt{KT})$ .
- 111 • **Adversarial rewards, stochastic contexts with unknown distribution:** We design an  
 112 algorithm called EXP3.CL-U with regret  $\tilde{O}(K^{1/3}T^{2/3})$ .
- 113 • **Lower bound for adversarial rewards, adversarial contexts:** We show that when both  
 114 rewards and contexts are controlled by an adversary, any algorithm must obtain regret at  
 115 least  $\tilde{\Omega}(\sqrt{CKT})$ .

116 All of these algorithms are easy to implement, in the sense that they can be obtained via simple  
 117 modifications from existing multi-armed bandit algorithms like EXP3 and UCB1, and efficient,  
 118 in the sense that all algorithms run in time at most  $O(C + K)$  per round (and for many of the  
 119 settings mentioned above, this can be further improved to  $O(K)$  time per round). Our main technical  
 120 contribution is our analysis of UCB1.CL, which requires arguing that UCB1 can effectively use  
 121 the information from cross-learning despite it being drawn from a distribution that differs from the  
 122 desired exploration distribution. We accomplish this by constructing a linear program whose value  
 123 upper bounds (one of the terms in) the regret of UCB1.CL, and bounding the value of this linear  
 124 program.

125 We then introduce a partial variant of cross-learning, where if you play action  $i$  in context  $c$ , you  
 126 learn the reward of action  $i$  in context  $c'$  for all  $c'$  in some set  $N_i(c)$ . We extend our algorithms  
 127 UCB1.CL and EXP3.CL to this partial variant of cross-learning (algorithms UCB1.P-CL and EXP3.P-  
 128 CL respectively) and bound their regrets in terms of invariants of the underlying directed feedback  
 129 graphs. Specifically, when rewards are stochastic, UCB1.P-CL obtains regret  $O(\sqrt{\bar{\kappa}KT})$ , where  $\bar{\kappa}$  is  
 130 the average size of the *minimum clique cover* of the feedback graphs. When contexts are stochastic,  
 131 EXP3.P-CL obtains regret  $O(\sqrt{\bar{\lambda}KT})$ , where  $\bar{\lambda}$  is the average size of the *maximum acyclic subgraph*  
 132 of the feedback graphs.

133 We then apply our results to some of the applications listed above. In each case, our algorithms obtain  
 134 optimal regret bounds with asymptotically less regret than a naive application of contextual bandits  
 135 algorithms. In particular:

- 136 • For the problem of learning to bid in a first-price auction, standard contextual bandit  
 137 algorithms get regret  $O(T^{3/4})$ . Our algorithms achieve regret  $O(T^{2/3})$ . This is optimal  
 138 even when there is only a single context (value).
- 139 • For the problem of multi-armed bandits with exogenous costs, standard contextual bandit  
 140 algorithms get regret  $O(T^{(K+1)/(K+2)}K^{1/(K+2)})$ . Our algorithms get regret  $\tilde{O}(\sqrt{KT})$ ,  
 141 which is tight.
- 142 • For our variant of sleeping bandits, standard contextual bandit algorithms get regret  
 143  $\tilde{O}(\sqrt{2^K KT})$ . Our algorithms get regret  $\tilde{O}(\sqrt{KT})$ , which is tight. By applying our al-

144 algorithms for partial cross-learning, we can achieve regret  $\tilde{O}(\sqrt{KT})$  in the original sleeping  
 145 bandits setting studied in [16], which recovers their results and is similarly tight.

146 Finally, we test the performance of these algorithms on real auction data from a first-price ad exchange.  
 147 In order for cross-learning to be effective in first-price auctions, the bidder should be able to determine  
 148 the counterfactual utility for different values. That is, after observing the outcome of the auction, the  
 149 bidder should predict how would their utility change if their value was different. This is possible  
 150 when the bidder’s values are independent of other players’ bid. In practice, however, one would  
 151 expect certain degree of correlation between these quantities and, thus, the independence assumption  
 152 might not hold. Even though our algorithms do not explicitly account for correlation, numerical  
 153 results show that our algorithms are somewhat robust to errors in the cross-learning hypothesis and  
 154 outperform traditional bandit algorithms. We remark that, from the theoretical perspective, when the  
 155 correlation between values and bids is arbitrary, cross-learning is impossible and the decision maker  
 156 cannot do better than running a different learning algorithm for each context. A promising research  
 157 direction is to incorporate correlation by introducing a statistical or behavioral model to capture the  
 158 dependency between bids and values.

## 159 1.1 Related Work

160 For a general overview of research on the multi-armed bandit problem, we recommend the reader to  
 161 the survey by Bubeck and Cesa-Bianchi [7]. Our algorithms build off of pre-existing algorithms in  
 162 the bandits literature, such as EXP3 [4] and UCB1 [23, 17]. Contextual bandits were first introduced  
 163 under that name in [18], although similar ideas were present in previous works (e.g. the EXP4  
 164 algorithm was proposed in [4]).

165 One line of research related to ours studies bandit problems under other structural assumptions  
 166 on the problem instances which allow for improved regret bounds. Slivkins [24] studies a setting  
 167 where contexts and actions belong to a joint metric space, and context/action pairs that are close to  
 168 each other give similar rewards, thus allowing for some amount of “cross-learning”. Several works  
 169 [20, 1] study a partial-feedback variant of the (non-contextual) multi-armed bandit problem where  
 170 performing some action provides some information on the rewards of performing other actions (thus  
 171 interpolating between the bandits and experts settings). Our setting can be thought of as a contextual  
 172 version of this variant, and our results in the partial cross-learning setting share similarities with  
 173 these results. However, since the learner cannot choose the context each round, these two settings  
 174 are qualitatively different. As far as we are aware, the specific problem of contextual bandits with  
 175 cross-learning between contexts has not appeared in the literature before.

176 Recently there has been a surge of interest in applying methods from online learning and bandits  
 177 to auction design. While the majority of the work in this area has been from the perspective of  
 178 the auctioneer [22, 21, 8, 10, 12] – learning how to design an auction over time based on bidder  
 179 behavior – some recent work studies this problem from the perspective of a buyer learning how to bid  
 180 [27, 11, 6]. In particular, [27] studies the problem of learning to bid in a first-price auction over time,  
 181 but where the bidder’s value remains constant (so there is no context). More generally, ideas from  
 182 online learning (in particular, the concept of no-regret learning) have been applied to the study of  
 183 general Bayesian games, where one can characterize the set of equilibria attainable when all players  
 184 are running low-regret learning algorithms [13].

## 185 2 Model and Preliminaries

### 186 2.1 Multi-armed bandits

187 In the classic multi-armed bandit problem, a learner chooses one of  $K$  arms per round over the course  
 188 of  $T$  rounds. On round  $t$ , the learner receives some reward  $r_{i,t} \in [0, 1]$  for pulling arm  $i$  (where the  
 189 rewards  $r_{i,t}$  may be chosen adversarially). The learner’s goal is to maximize their total reward.

190 Let  $I_t$  denote the arm pulled by the decision maker at round  $t$ . The *regret* of an algorithm  $A$  for  
 191 the learner is the random variable  $\text{Reg}(A) = \max_i \sum_{t=1}^T r_{i,t} - \sum_{t=1}^T r_{I_t,t}$ . We say an algorithm  
 192  $A$  for the multi-armed bandit problem is  $\delta$ -*low-regret* if  $\mathbb{E}[\text{Reg}(A)] \leq \delta$  (where the expectation is  
 193 taken over the randomness of  $A$ ). We say an algorithm  $A$  is *low-regret* if it is  $\delta$ -low-regret for some

194  $\delta = o(T)$ . There exist simple multi-armed bandit algorithms which are  $\tilde{O}(\sqrt{KT})$ -low-regret (e.g.  
 195 EXP3 when rewards are adversarial, and UCB1 when rewards are stochastic).

## 196 2.2 Contextual bandits

197 In our model, we consider a *contextual bandits* problem. In the contextual bandits problem, in  
 198 each round  $t$  the learner is additionally provided with a *context*  $c_t$ , and the learner now receives  
 199 reward  $r_{i,t}(c)$  if he pulls arm  $i$  on round  $t$  while having context  $c$ . The contexts  $c_t$  are either chosen  
 200 adversarially at the beginning of the game or drawn independently each round from some distribution  
 201  $\mathcal{D}$ . Similarly, the rewards  $r_{i,t}(c)$  are either chosen adversarially or each independently drawn from  
 202 some distribution  $\mathcal{F}_i(c)$ . We assume as is standard that  $r_{i,t}(c)$  is always bounded in  $[0, 1]$ .

203 In the contextual bandits setting, we now define the regret of an algorithm  $A$  in terms of regret against  
 204 the best stationary policy  $\pi$ ; that is,  $\max_{\pi: [C] \rightarrow [K]} \sum_{t=1}^T r_{\pi(c_t),t}(c_t) - \sum_{t=1}^T r_{I_t,t}(c_t)$ , where  $I_t$  is  
 205 the arm pulled by  $M$  on round  $t$ . The definition of best stationary policy  $\pi$  depends slightly on how  
 206 contexts and rewards are chosen:

- 207 • When rewards are stochastic ( $r_{i,t}(c)$  drawn independently from  $\mathcal{F}_i(c)$  with mean  $\mu_i(c)$ ), we  
 208 define  $\pi(c) = \arg \max_i \mu_i(c)$ .
- 209 • When rewards are adversarial but contexts are stochastic, we define  $\pi(c)$  to be the stationary  
 210 policy which maximizes  $\mathbb{E}_{c_t \sim \mathcal{D}} [\sum_t r_{\pi(c_t),t}(c_t)]$ .
- 211 • When both rewards and contexts are adversarial, we define  $\pi(c)$  to be the stationary policy  
 212 which maximizes  $\sum_t r_{\pi(c_t),t}(c_t)$ .

213 These choices are unified in the following way: in all of the above cases,  $\pi$  is the best stationary policy  
 214 in expectation for someone who knows all the decisions of the adversary and details of the system  
 215 ahead of time, but not the randomness in the instantiations of contexts/rewards from distributions. This  
 216 matches commonly studied notions of regret in the contextual bandits literature; see Appendix A.1  
 217 for further discussion. As before, we say an algorithm is  $\delta$ -low regret if  $\mathbb{E}[\text{Reg}(A)] \leq \delta$ , and say an  
 218 algorithm is low-regret if it is  $\delta$ -low-regret for some  $\delta = o(T)$ . The stationary policy in the third  
 219 definition is sometimes referred as the best policy in hindsight as it considers the best actions that  
 220 could have been taken after observing all realizations of rewards and contexts. In many applications,  
 221 however, this benchmark is too strong. Even when contexts are stochastically drawn from a known  
 222 distribution no algorithm can be shown to achieve sub-linear regret when the number of contexts is  
 223 large enough (see Theorem 21 in Appendix A.1). Therefore, we adopt the first two benchmarks when  
 224 contexts are stochastic.

225 There is a simple way to construct a low-regret algorithm  $A'$  for the contextual bandits problem from  
 226 a low-regret algorithm  $A$  for the classic bandits problem: simply maintain a separate instance of  $A$   
 227 for every different context  $c$ . In the contextual bandits literature, this is sometimes referred to as  
 228 the  $S$ -EXP3 algorithm when  $A$  is EXP3 [7]. This algorithm is  $\tilde{O}(\sqrt{CKT})$ -low-regret. We define  
 229 the  $S$ -UCB1 algorithm similarly, which is also  $\tilde{O}(\sqrt{CKT})$ -low-regret when rewards are generated  
 230 stochastically.

231 We consider a variant of the contextual bandits problem we call *contextual bandits with cross-learning*.  
 232 In this variant, whenever the learner pulls arm  $i$  in round  $t$  while having context  $c$  and receives reward  
 233  $r_{i,t}(c)$ , they also learn the value of  $r_{i,t}(c')$  for all other contexts  $c'$ . We define the notions of regret  
 234 and low-regret similarly for this problem.

## 235 3 Cross-learning between contexts

236 In this section, we present two algorithms for the contextual bandits problem with cross-learning:  
 237 UCB1.CL, for stochastic rewards and adversarial contexts (Section 3.1), and EXP3.CL, for adversarial  
 238 rewards and stochastic contexts (Section 3.2). Then, in Section 3.3, we show that it is impossible to  
 239 achieve regret better than  $\tilde{O}(\sqrt{CKT})$  when both rewards and contexts are controlled by an adversary  
 240 (in particular, when both rewards and contexts are adversarial, cross-learning may not be beneficial at  
 241 all).

### 242 3.1 Stochastic rewards

243 In this section we will present an  $O(\sqrt{KT \log K})$  algorithm for the contextual bandits problem with  
 244 cross learning in the stochastic reward setting: i.e., every reward  $r_{i,t}(c)$  is drawn independently from  
 245 an unknown distribution  $\mathcal{F}_i(c)$  supported on  $[0, 1]$ . Importantly, this algorithm works even when the  
 246 contexts are chosen adversarially, unlike our algorithms for the adversarial reward setting. We call  
 247 this algorithm UCB1.CL (Algorithm 1).

---

**Algorithm 1**  $O(\sqrt{KT \log K})$  regret algorithm (UCB1.CL) for the contextual bandits problem with cross-learning where rewards are stochastic and contexts are adversarial.

---

```

1: Define the function  $\omega(s) = \sqrt{(2 \log T)/s}$ .
2: Pull each arm  $i \in [K]$  once (pulling arm  $i$  in round  $i$ ).
3: Maintain a counter  $\tau_{i,t}$ , equal to the number of times arm  $i$  has been pulled up to round  $t$  (so  $\tau_{i,K} = 1$  for all  $i$ ).
4: For all  $i \in [K]$  and  $c \in [C]$ , initialize variable  $\sigma_{i,K}(c)$  to  $r_{i,i}(c)$ . Write  $\bar{r}_{i,t}(c)$  as shorthand for  $\sigma_{i,t}(c)/\tau_{i,t}$ .
5: for  $t = K + 1$  to  $T$  do
6:   Receive context  $c_t$ .
7:   Let  $I_t$  be the arm which maximizes  $\bar{r}_{I_t,t-1}(c_t) + \omega(\tau_{I_t,t-1})$ .
8:   Pull arm  $I_t$ , receiving reward  $r_{I_t,t}(c_t)$ , and learning the value of  $r_{I_t,t}(c)$  for all  $c$ .
9:   for each  $c$  in  $[C]$  do
10:    Set  $\sigma_{I_t,t}(c) = \sigma_{I_t,t-1}(c) + r_{I_t,t}(c)$ .
11:   end for
12:   Set  $\tau_{I_t,t} = \tau_{I_t,t-1} + 1$ .
13: end for

```

---

248 The UCB1.CL algorithm is a straightforward generalization of  $S$ -UCB1; both algorithms maintain a  
 249 mean and upper confidence bound for each action in each context, and always choose the action with  
 250 the highest upper confidence bound (the difference being, as with EXP3.CL-U, that UCB1.CL uses  
 251 cross-learning to update the appropriate means and confidence bounds for all contexts each round).  
 252 The analysis of UCB1.CL, however, requires new ideas to deal with the fact that the observations of  
 253 rewards may be drawn from a very different distribution than the desired exploration distribution.

254 Very roughly, the analysis is structured as follows. Since rewards are stochastic, in every context  $c$ ,  
 255 there is a “best arm”  $i^*(c)$  that the optimal policy always plays. Every other arm  $i$  is some amount  
 256  $\Delta_i(c)$  worse in expectation than the best arm. After observing this arm  $m_i(c) = O(\log(T)/\Delta_i(c)^2)$   
 257 times, one can be confident that this arm is not the best arm. We can decompose the regret into the  
 258 regret incurred “before” and “after” the algorithm is confident that an arm is not optimal in a specific  
 259 context. The regret “after” can be bounded using standard techniques from the bandit literature. Our  
 260 main contribution is the bound of the regret “before.”

261 Fix an arm  $i$  and let  $X_i(c)$  be the number of times the algorithm pulls arm  $i$  in context  $c$  before pulling  
 262 arm  $i$  a total of  $m_i(c)$  times across all contexts. Because once arm  $i$  is pulled  $m_i(c)$  times we are  
 263 confident about the optimality of pulling that arm in context  $c$ , we only need to control the number  
 264 pulls before  $m_i(c)$ . Therefore, the regret “before” of arm  $i$  is roughly  $\sum_c X_i(c) \Delta_i(c)$ .

265 We control the regret “before” by setting up a linear program in the variables  $X_i(c)$  with objective  
 266  $\sum_{c,i} X_i(c) \Delta_i(c)$ . Because  $X_i(c)$  counts all pulls of arm  $i$  before  $m_i(c)$  we have that  $X_i(c) \leq m_i(c)$ .  
 267 This inequality, while valid, does not lead to a tight bound. To obtain a tighter inequality we first sort  
 268 the contexts in terms of the samples needed to learn whether an arm is optimal, i.e., in increasing  
 269 order of  $m_i(c)$ . Because a different context is realized in every round, we can consider the inequality  
 270  $\sum_{c': m_i(c') \leq m_i(c)} X_i(c') \leq m_i(c)$ , which counts the subset of first  $m_i(c)$  pulls of arm  $i$ . Bounding  
 271 the value of this objective (by effectively taking the dual), we can show that the total regret is at most  
 272  $O(\sqrt{T})$ .

273 **Theorem 1** (Regret of UCB1.CL). *UCB1.CL (Algorithm 1) has expected regret  $O(\sqrt{KT \log K})$*   
 274 *for the contextual bandits problem with cross-learning in the setting with stochastic rewards and*  
 275 *adversarial contexts.*

276 *Proof.* We begin by defining the following notation. Let  $\mu_i(c)$  be the mean of distribution  $\mathcal{F}_i(c)$ . Let  
 277  $i^*(c) = \arg \max_j \mu_j(c)$ , and let  $\mu^*(c) = \mu_{i^*(c)}(c)$ . Let  $\Delta_i(c) = \mu^*(c) - \mu_i(c)$  be the gap between  
 278 the expected reward of playing arm  $i$  in context  $c$  and of playing the optimal arm  $i^*(c)$  in context  $c$ .  
 279 As defined in Algorithm 1, let  $\tau_{i,t}$  be the number of times arm  $i$  has been pulled up to round  $t$ , and  
 280 define  $\tau_{i,t}(c)$  to be the number of times arm  $i$  has been pulled in context  $c$  up to round  $t$ . Note that  
 281 the regret  $\text{Reg}(\mathcal{A})$  of our algorithm is then equal to

$$\begin{aligned} \text{Reg}(\mathcal{A}) &= \sum_{i=1}^K \sum_{c=1}^C \Delta_i(c) \tau_{i,c}(T) \\ &= \sum_{i=1}^K \sum_{c=1}^C \sum_{t=1}^T \Delta_i(c) \mathbb{1}(I_t = i, c_t = c). \end{aligned}$$

282 Define  $\Delta_{\min} = \sqrt{K \log T / T}$ . Note that the sum of all terms in the above expression with  $\Delta_i(c) \leq$   
 283  $\Delta_{\min}$  is at most  $\Delta_{\min} T$ . We can therefore write

$$\text{Reg}(\mathcal{A}) \leq \Delta_{\min} T + \sum_{i=1}^K \sum_c \sum_{t=1}^T \Delta_i(c) \mathbb{1}(I_t = i, c_t = c, \Delta_i(c) \geq \Delta_{\min}). \quad (1)$$

284 For convenience of notation, from now on, without loss of generality, we assume that all  $\Delta_i(c) \geq$   
 285  $\Delta_{\min}$ , and suppress the condition  $\Delta_i(c) \geq \Delta_{\min}$  in the indicator variables.

286 Now, define  $m_i(c) = \frac{8 \log T}{\Delta_i(c)^2}$ . This quantity represents the number of times one must pull arm  $i$  to  
 287 observe that  $i$  is not the best arm in context  $c$  (we will show this later). We thus divide the sum in (1)  
 288 into two parts. Define:

$$\text{Reg}_{\text{Pre}} = \sum_{i=1}^K \sum_{c=1}^C \sum_{t=1}^T \Delta_i(c) \mathbb{1}(I_t = i, c_t = c, \tau_{i,t} \leq m_i(c)), \quad (2)$$

289 and

$$\text{Reg}_{\text{Post}} = \sum_{i=1}^K \sum_{c=1}^C \sum_{t=1}^T \Delta_i(c) \mathbb{1}(I_t = i, c_t = c, \tau_{i,t} > m_i(c)). \quad (3)$$

290 These two quantities represent the regret incurred before and after (respectively) the algorithm  
 291 “realizes” an arm is not optimal in a specific context. With these quantities, we can rewrite (1) as

$$\text{Reg}(\mathcal{A}) \leq \Delta_{\min} T + \text{Reg}_{\text{Pre}} + \text{Reg}_{\text{Post}}. \quad (4)$$

292 In the following two lemmas, we will now proceed to bound the expected values of  $\text{Reg}_{\text{Pre}}$  and  
 293  $\text{Reg}_{\text{Post}}$ . In particular, the following lemma that bounds  $\mathbb{E}[\text{Reg}_{\text{Pre}}]$  is our main technical contribution  
 294 in this proof.

**Lemma 2.** *Let  $\text{Reg}_{\text{Pre}}$  be the quantity defined in (2). Then,*

$$\mathbb{E}[\text{Reg}_{\text{Pre}}] \leq \frac{16K \log T}{\Delta_{\min}}.$$

295 *Proof.* Fix an action  $i$ , and order the contexts (that satisfy  $\Delta_i(c) \geq \Delta_{\min}$ )  $c_{(1)}, c_{(2)}, \dots, c_{(n)}$   
 296 so that  $\Delta_i(c_{(1)}) \geq \Delta_i(c_{(2)}) \geq \dots \geq \Delta_i(c_{(n)})$ . By the definition of  $m_i(c)$ , this implies that  
 297  $m_i(c_{(1)}) \leq m_i(c_{(2)}) \leq \dots \leq m_i(c_{(n)})$ . Finally, define

$$X_i(c) = \sum_{t=1}^T \mathbb{1}(c_t = c, I_t = i, \tau_{i,t} \leq m_i(c)).$$

298 The quantity  $X_i(c)$  can be thought of as the number of times action  $i$  is played during context  $c$   
 299 before the  $m_i(c)$ th time action  $i$  has been played. Note that

$$\sum_{c=1}^C \sum_{t=1}^T \Delta_i(c) \mathbb{1}(I_t = i, c_t = c, \tau_{i,t} \leq m_i(c)) = \sum_{j=1}^n \Delta_i(c_{(j)}) X_i(c_{(j)}).$$

300 On the other hand, by the definition of  $X_i(c)$  and the ordering of  $m_i(c_{(j)})$ , we know that the  $X_i(c)$ 's  
 301 satisfy the following system of linear inequalities:

$$\begin{aligned} X_i(c_{(1)}) &\leq m_i(c_{(1)}) \\ X_i(c_{(1)}) + X_i(c_{(2)}) &\leq m_i(c_{(2)}) \\ &\vdots \\ X_i(c_{(1)}) + X_i(c_{(2)}) + \cdots + X_i(c_{(n)}) &\leq m_i(c_{(n)}). \end{aligned} \tag{5}$$

302 To see why the above inequalities hold, for simplicity, focus on the second inequality (the same  
 303 argument can be applied for other inequalities). First note that by the fact that  $m_i(c_{(1)}) \leq m_i(c_{(2)})$ ,  
 304 we have

$$X_i(c_{(1)}) + X_i(c_{(2)}) \leq \sum_{t=1}^T \mathbb{1}(c_t = c_{(1)}, I_t = i, \tau_{i,t} \leq m_i(c_{(2)})) + \sum_{t=1}^T \mathbb{1}(c_t = c_{(2)}, I_t = i, \tau_{i,t} \leq m_i(c_{(2)}))$$

305 Further, note that whenever  $\mathbb{1}(I_t = i, c_t = c_{(1)}, \tau_{i,t} \leq m) = 1$ , then  $\mathbb{1}(I_t = i, c_t = c_{(2)}, \tau_{i,t} \leq$   
 306  $m) = 0$  and vice versa. This implies that

$$X_i(c_{(1)}) + X_i(c_{(2)}) \leq \sum_{t=1}^T \mathbb{1}((c_t = c_{(1)} \text{ or } c_t = c_{(2)}), I_t = i, \tau_{i,t} \leq m_i(c_{(2)})) \leq m_i(c_{(2)}).$$

307 Now, we wish to bound  $\sum_j \Delta_i(c_{(j)}) X_i(c_{(j)})$ . To do this, multiply the  $j$ th inequality in Eq. (5)  
 308 through by  $\Delta_i(c_{(j)}) - \Delta_i(c_{(j+1)})$  (for the last inequality, just multiply it through by  $\Delta_i(c_{(n)})$ ), and  
 309 sum all of these inequalities to obtain

$$\begin{aligned} \sum_{j=1}^n \Delta_i(c_{(j)}) X_i(c_{(j)}) &\leq \Delta_i(c_{(n)}) m_i(c_{(n)}) + \sum_{j=1}^{n-1} (\Delta_i(c_{(j)}) - \Delta_i(c_{(j+1)})) m_i(c_{(j)}) \\ &= 8 \log T \left( \frac{1}{\Delta_i(c_n)} + \sum_{j=1}^{n-1} \frac{\Delta_i(c_{(j)}) - \Delta_i(c_{(j+1)})}{\Delta_i(c_{(j)})^2} \right) \\ &\leq 8 \log T \left( \frac{1}{\Delta_{\min}} + \int_{\Delta_{\min}}^1 \frac{dx}{x^2} \right) \\ &\leq \frac{16 \log T}{\Delta_{\min}}, \end{aligned}$$

310 where the second equation follows because  $m_i(c) = \frac{8 \log T}{\Delta_i(c)^2}$ , and the third equation holds because  
 311  $\Delta_i(c_j) \geq \Delta_{\min}$  for any  $j \in [n]$ . Summing this over all  $K$  choices of  $i$ , we obtain our desired  
 312 bound.  $\square$

313 We next proceed to bound the expected value of  $\text{Reg}_{\text{POST}}$ . This follows from the standard analysis  
 314 of UCB1.

**Lemma 3.** *Let  $\text{Reg}_{\text{Post}}$  be the quantity defined in (2). Then,*

$$\mathbb{E} [\text{Reg}_{\text{Post}}] \leq \frac{K \pi^2}{3}.$$

315 *Proof.* See appendix.  $\square$



316 Substituting the results of Lemmas 2 and 3 into (11), we obtain

$$\mathbb{E}[\text{Reg}(\mathcal{A})] \leq \Delta_{\min} T + \frac{16K \log T}{\Delta_{\min}} + \frac{K\pi^2}{3}. \quad (6)$$

317 Substituting in  $\Delta_{\min} = \sqrt{K \log T / T}$ , it is straightforward to verify that  $\mathbb{E}[\text{Reg}(\mathcal{A})] \leq$   
 318  $O(\sqrt{KT \log T})$ , as desired.  $\square$

319 Note that as a consequence of the proof of Theorem 1, we have the following gap-dependent bound  
 320 on the regret of UCB1.CL.

321 **Corollary 4** (Gap-dependent Bound for UCB1.CL). *Let  $\Delta_{\min} = \min_{i,c} \mu^*(c) - \mu_i(c)$  (where*  
 322  $\mu^*(c) = \max_i \mu_i(c)$ ). *Then UCB1.CL (Algorithm 1) has expected regret of  $O\left(\frac{K \log T}{\Delta_{\min}}\right)$  for the*  
 323 *contextual bandits problem with cross-learning in the setting with stochastic rewards and adversarial*  
 324 *contexts.*

### 325 3.2 Adversarial rewards and stochastic contexts

326 We now present a  $O(\sqrt{KT \log K})$  regret algorithm for the contextual bandits problem with cross  
 327 learning when the rewards are adversarially chosen but contexts are stochastically drawn from some  
 328 distribution  $\mathcal{D}$ . We call this algorithm EXP3.CL (Algorithm 2). For now we assume the learner knows  
 329 the distribution over contexts  $\mathcal{D}$ .

---

**Algorithm 2**  $O(\sqrt{KT \log K})$  regret algorithm for the contextual bandits problem with simulated contexts.

---

- 1: Choose  $\alpha = \beta = \sqrt{\frac{\log K}{KT}}$ .
  - 2: Initialize  $K \cdot C$  weights, one for each pair of action  $i$  and context  $c$ , letting  $w_{i,t}(c)$  be the value of the  $i$ th weight for context  $c$  at round  $t$ . Initially, set all  $w_{i,0} = 1$ .
  - 3: **for**  $t = 1$  to  $T$  **do**
  - 4:   Draw context  $c_t$  from  $\mathcal{D}$ .
  - 5:   For all  $i \in [K]$  and  $c \in [C]$ , let  $p_{i,t}(c) = (1 - K\alpha) \frac{w_{i,t-1}(c)}{\sum_{j=1}^K w_{j,t-1}(c)} + \alpha$ .
  - 6:   Sample an arm  $I_t$  from the distribution  $p_t(c_t)$ .
  - 7:   Pull arm  $I_t$ , receiving reward  $r_{I_t,t}(c_t)$ , and learning the value of  $r_{I_t,t}(c)$  for all  $c$ .
  - 8:   **for** each  $c$  in  $[C]$  **do**
  - 9:     Set  $w_{I_t,t}(c) = w_{I_t,t-1}(c) \cdot \exp\left(\beta \cdot \frac{r_{I_t,t}(c)}{\sum_{c'=1}^C \Pr_{\mathcal{D}}[c'] \cdot p_{I_t,t}(c')}.$
  - 10:   **end for**
  - 11: **end for**
- 

330 Both EXP3.CL and  $S$ -EXP3 maintain a weight for each action in each context, and update the weights  
 331 via multiplicative updates by an exponential of an unbiased estimator of the reward. We modify  
 332  $S$ -EXP3 by changing the unbiased estimator in the update rule to take advantage of the information  
 333 from cross-learning. To minimize regret, we wish to choose an unbiased estimator with minimal  
 334 variance (as the expected variance of this estimator shows up in the final regret bound). The new  
 335 estimator in question is

$$\hat{r}_{i,t}(c) = \frac{r_{i,t}(c)}{\sum_{c'=1}^C \Pr_{\mathcal{D}}[c'] \cdot p_{i,t}(c')} \cdot \mathbb{1}_{I_t=i}.$$

336 There are two ways of thinking about this estimator. The first is to note that the denominator of this  
 337 estimator is exactly the probability of pulling arm  $i$  on round  $t$  before you learn the realization of  
 338  $c_t$  (and hence this estimator is unbiased). The second way is to note that for every context  $c'$ , it is  
 339 possible to construct an estimator of the form

$$\hat{r}_{i,t}(c) = \frac{r_{i,t}(c)}{\Pr_{\mathcal{D}}[c'] \cdot p_{i,t}(c')} \mathbb{1}_{I_t=i, c_t=c'}.$$

The estimator used in EXP3.CL is the linear combination of these estimators which minimizes variance (i.e. the estimator obtained from importance sampling over this class of estimators). We can show that the total expected variance of this estimator is on the order of  $O(\sqrt{KT})$ , independent of  $C$ , implying the following regret bound.

**Theorem 5.** EXP3.CL (Algorithm 2) has regret  $O(\sqrt{TK \log K})$  for the contextual bandits problem with cross learning when rewards are adversarial and contexts are stochastic.

Calculating this estimator  $\hat{r}_{i,t}(c)$  requires the learner to know the distribution  $\mathcal{D}$ . What can we do if the learner does not know the distribution  $\mathcal{D}$ ? Unlike distributions of rewards (where the learner must actively choose which reward distribution to receive a sample from), the learner receives exactly one sample from  $\mathcal{D}$  every round regardless of their action. This suggests the following approach: learn an approximation  $\hat{\mathcal{D}}$  to  $\mathcal{D}$  by observing the context for some number of rounds, and run EXP3.CL using  $\hat{\mathcal{D}}$  to compute estimators. Unfortunately, a straightforward analysis of this approach gives regret that scales as  $T^{2/3}$  due to the approximation error in  $\hat{\mathcal{D}}$ .

In Appendix A.2, we design a learning algorithm EXP3.CL-U which achieves regret  $\tilde{O}(K^{1/3}T^{2/3})$  even when the distribution  $\mathcal{D}$  is unknown by using a much simpler (but higher variance) estimator that does not require  $\mathcal{D}$  to compute. It is an interesting open problem whether it is possible to obtain  $\tilde{O}(\sqrt{KT})$  regret when  $\mathcal{D}$  is unknown.

### 3.3 Adversarial rewards, adversarial contexts

A natural question is whether we can achieve low-regret when both the rewards and contexts are chosen adversarially (but where we still can cross-learn between different contexts). A positive answer to this question would subsume the results of the previous sections. Unfortunately, we will show in this section that any learning algorithm for the contextual bandits problem with cross-learning must necessarily incur  $\Omega(\sqrt{CKT})$  regret (which is achieved by  $S$ -EXP3).

We will need the following regret lower-bound for the (non-contextual) multi-armed bandits problem.

**Lemma 6.** *There exists a distribution over instances of the multi-armed bandit problem where any algorithm must incur an expected regret of at least  $\Omega(\sqrt{KT})$ .*

*Proof.* See [4]. □

With this lemma, we can construct the following lower-bound for the contextual bandits problem with cross-learning by connecting  $C$  independent copies of these hard instances in sequence with one another so that cross-learning between instances is not possible.

**Theorem 7.** *There exists a distribution over instances of the contextual bandit problem with cross-learning where any algorithm must incur a regret of at least  $\Omega(\sqrt{CKT})$ .*

*Proof.* Divide the  $T$  rounds into  $C$  epochs of  $T/C$  rounds each. Label the  $C$  contexts  $c_1, c_2, \dots, c_C$ , and adversarially assign contexts so that the context during the  $j$ th epoch is always  $c_j$ .

Next, assign rewards so that  $r_{i,t}(c) = 0$  if  $t$  is in the  $j$ th epoch and  $c \neq c_j$ . On the other hand, for  $t$  in the  $j$ th epoch, set rewards  $r_{i,t}(c_j)$  according to a hard instance for the multi-armed bandit problem sampled from the distribution from Lemma 6. Call this instance  $P_j$ , and let  $i_j$  be the optimal action to play in  $P_j$ .

By construction, the best stationary strategy plays  $i_j$  whenever the context is  $c_j$ . In addition, note that cross-learning offers zero additional information here, since all cross-learned rewards will always be 0. Since the hard instances  $P_j$  are all independent of each other, any algorithm for the contextual bandits problem with cross-learning which achieves  $o(\sqrt{CKT})$  expected regret on this instance must achieve  $o(\sqrt{KT/C})$  expected regret on one of the individual instances  $P_j$ . This contradicts Lemma 6. □

## 4 Partial cross-learning

So far, we have assumed that our cross-learning between contexts is complete: if we play action  $i$  in context  $c$ , we learn the value of the reward  $r_{i,t}(c')$  for all contexts  $c'$ . In many settings, however, we do not have complete cross-learning, and may only learn the reward  $r_{i,t}(c')$  for some subset of contexts  $c'$  (e.g. contexts similar to  $c$ ).

In this section we consider the following model of partial cross-learning. For every action  $i \in [K]$ , we specify a directed graph  $G_i$  over the set of contexts  $[C]$ . An edge  $c \rightarrow c'$  in  $G_i$  indicates that if you play action  $i$  in context  $c$ , you learn the reward of action  $i$  in context  $c'$ . We assume that all self-loops  $c \rightarrow c$  are present in all graphs  $G_i$  (i.e. if you play action  $i$  in context  $c$  you learn the reward of action  $i$  in context  $c$ ).

### 4.1 Graph invariants

Throughout the remainder of this section we will assume that all graphs  $G$  are directed and contain all self-loops. Given a vertex  $v$  in  $G$ , let  $P(v)$  equal the set of in-neighbors, i.e., vertices  $w$  such that there exists an edge  $w \rightarrow v$ , and let  $N(v)$  equal the set of vertices of out-neighbors, i.e.,  $w$  such that there exists an edge  $v \rightarrow w$  (note that since all our graphs contain self-loops,  $v \in N(v)$  and  $v \in P(v)$ ). Before proceeding we define some useful graph-theoretic quantities that will be used to analyze the performance of our algorithms in the partial cross-learning setting.

**Definition 8.** A subclique of a graph  $G$  is a subset of vertices  $S$  such that for any two vertices  $u, v \in S$ , there exists an edge  $u \rightarrow v$ . A clique cover of a graph  $G$  is a partition of its set of vertices into subcliques  $S_1, S_2, \dots, S_r$  (we say  $r$  is the size of the clique cover). The clique covering number  $\kappa(G)$  is the minimum size of a clique cover of  $G$ .

**Definition 9.** An independent set in a graph  $G$  is a subset of vertices  $S$  such that for any two distinct vertices  $u, v \in S$ , the edge  $u \rightarrow v$  does not exist in  $G$ . The independence number  $\iota(G)$  is the maximum size of an independent set of  $G$ .

**Definition 10.** An acyclic subgraph of a graph  $G$  is a set of vertices that can be ordered  $v_1, v_2, \dots, v_r$  such that for any  $i > j$ , there is no edge  $v_i \rightarrow v_j$ . The maximum acyclic subgraph number  $\lambda(G)$  is the size of the largest acyclic subgraph of  $G$ .

**Definition 11.** The value  $\nu_2(G)$  of a graph  $G$  (with vertex set  $V$ ) is given by

$$\nu_2(G) = \sup_{\substack{f: V \rightarrow \mathbb{R}^+ \\ \sum_{v \in V} f(v) = 1}} \left( \sum_{v \in V} \frac{f(v)}{\sqrt{\sum_{w \in P(v)} f(w)}} \right)^2.$$

**Lemma 12.** For all directed graphs  $G$  with self-loops,

$$\lambda(G) = \sup_{f: V \rightarrow \mathbb{R}^+} \sum_{v \in V} \frac{f(v)}{\sum_{w \in P(v)} f(w)}.$$

*Proof.* Denote the right-hand-side of the above expression by  $\nu(G)$ . We begin by showing that  $\nu(G) \geq \lambda(G)$ .

Let  $(v_1, v_2, \dots, v_{\lambda(G)})$  be an acyclic subgraph of  $G$  of maximum size. Fix a large  $M > 1$ , and consider the following function  $f: V \rightarrow \mathbb{R}^+$ :  $f(v) = M^i$  if  $v = v_i$ , and  $f(v) = 1$  otherwise. We claim that as  $M \rightarrow \infty$ , the quantity

$$\sum_v \frac{f(v)}{\sum_{w \in P(v)} f(w)}$$

approaches a value larger than  $\lambda(G)$ . To do this, we will simply show that for each  $v_i$  in our acyclic subgraph, the quantity

$$\frac{f(v_i)}{\sum_{w \in P(v_i)} f(w)}$$

420 approaches a value larger than 1.

421 To see this, note that by the definition of an acyclic subgraph, for all  $j > i$ , there is no edge  $v_j \rightarrow v_i$ .  
 422 Therefore, for every  $w \in P(v_i)$  (with the exception of  $P(v_i)$  itself),  $f(w) \leq M^{i-1}$  because every  
 423  $w$  in  $P(v_i)$  is of the form  $v_j$  for some  $j < i$ , and therefore  $\sum_{w \in P(v_i)} f(w) \leq |V|M^{i-1} + M^i$ . It  
 424 follows that

$$\frac{f(v_i)}{\sum_{w \in P(v_i)} f(w)} \geq \frac{M^i}{|V|M^{i-1} + M^i}.$$

425 The right hand side of this expression converges to 1 as  $M$  approaches infinity.

426 The proof that  $\nu(G) \leq \lambda(G)$  follows from Lemma 10 in [2]. □

427 **Lemma 13.** *For all graphs  $G$ ,*

$$\iota(G) \leq \nu_2(G) \leq \lambda(G) \leq \kappa(G).$$

428 *When  $G$  is the union of  $r$  disjoint cliques, equality holds for all inequalities and all invariants equal  $r$ .*

429 *Proof.* We prove the inequalities in order.

430  $\iota(G) \leq \nu_2(G)$ : Let  $S$  be an independent set in  $G$  of size  $\iota(G)$ . Define the distribution  $f$  via  
 431  $f(v) = \frac{1-\varepsilon}{\iota(G)}$  (for some small  $\varepsilon$ ) for  $v \in S$  and  $f(v) = \frac{\varepsilon}{|V|-\iota(G)}$  for  $v \notin S$ . As  $\varepsilon \rightarrow 0$ , we have that

$$\sum_{v \in V} \frac{f(v)}{\sqrt{\sum_{w \in P(v)} f(w)}} \rightarrow \sum_{v \in S} \frac{1/\iota(G)}{\sqrt{1/\iota(G)}} = \sqrt{\iota(G)}.$$

432 It follows that

$$\nu_2(G) = \sup \left( \sum_{v \in V} \frac{f(v)}{\sqrt{\sum_{w \in P(v)} f(w)}} \right)^2 \geq \iota(G).$$

433  $\nu_2(G) \leq \lambda(G)$ : By Cauchy-Schwartz, for any distribution  $f$  over  $V$ , we have that

$$\left( \sum_{v \in V} \frac{f(v)}{\sqrt{\sum_{w \in P(v)} f(w)}} \right)^2 \leq \sum_{v \in V} \frac{f(v)}{\sum_{w \in P(v)} f(w)}.$$

434 Taking suprema of both sides, it follows that

$$\nu_2(G) = \sup_f \left( \sum_{v \in V} \frac{f(v)}{\sqrt{\sum_{w \in P(v)} f(w)}} \right)^2 \leq \sup_f \sum_{v \in V} \frac{f(v)}{\sum_{w \in P(v)} f(w)} = \lambda(G),$$

435 where the last equality follows from Lemma 12.

436  $\lambda(G) \leq \kappa(G)$ : Let  $(S_1, S_2, \dots, S_{\kappa(G)})$  be a minimum size clique covering of  $G$ . Note that no two  
 437 elements  $v, v'$  in the same  $S_i$  can belong to the same acyclic subgraph (since by the definition of a  
 438 clique, there exist edges  $v \rightarrow v'$  and  $v' \rightarrow v$ ). It follows that the size of the largest acyclic subgraph  
 439 is at most  $\kappa(G)$ , and thus  $\lambda(G) \leq \kappa(G)$ .

440 **Unions of cliques** We now show that when  $G$  is a disjoint union of  $r$  cliques,  $\iota(G) = \nu_2(G) =$   
 441  $\lambda(G) = \kappa(G) = r$ . To do so it suffices (from the above inequalities) to show that  $\iota(G) = r$  and  
 442  $\kappa(G) = r$ . The independence number  $\iota(G) = r$  since choosing one element from each clique creates  
 443 an independent set, and any set of  $r + 1$  or more vertices must have two vertices from the same clique.  
 444 The clique covering number  $\kappa(G) = r$  since we can cover the graph with the  $r$  given cliques, and  
 445 any covering with fewer than  $r$  sets must combine elements in disjoint cliques (thus violating the fact  
 446 that each set is a clique).  $\square$

## 447 4.2 Stochastic rewards

448 In this section we present a low-regret algorithm for the contextual bandits problem with partial  
 449 crosslearning when rewards are generated stochastically (from some unknown distribution). As with  
 450 the results in Section 3.1, our low-regret guarantee applies in this case regardless of whether the  
 451 contexts are generated stochastically or adversarially.

---

**Algorithm 3**  $O(\sqrt{\bar{\kappa}KT \log K})$  regret algorithm (UCB1.P-CL) for the contextual bandits problem with partial cross-learning where rewards are stochastic.

---

- 1: Define the function  $\omega(s) = \sqrt{(2 \log T)/s}$ .
  - 2: Pull each arm  $i \in [K]$  once (pulling arm  $i$  in turn  $i$ ).
  - 3: Maintain a counter  $\tau_{i,t}$ , equal to the number of times arm  $i$  has been pulled up to round  $t$  (so  $\tau_{i,K} = 1$  for all  $i$ ).
  - 4: For all  $i \in [K]$  and  $c \in [C]$ , initialize variable  $\sigma_{i,K}(c)$  to  $r_{i,i}(c)$ . Write  $\bar{r}_{i,t}(c)$  as shorthand for  $\sigma_{i,t}(c)/\tau_{i,t}$ .
  - 5: **for**  $t = K + 1$  to  $T$  **do**
  - 6:   Receive context  $c_t$ .
  - 7:   Let  $I_t$  be the arm which maximizes  $\bar{r}_{I_t,t-1}(c_t) + \omega(\tau_{I_t,t-1})$ .
  - 8:   Pull arm  $I_t$ , receiving reward  $r_{I_t,t}(c_t)$ , and learning the value of  $r_{I_t,t}(c)$  for all  $c \in N_{I_t}(c_t)$ .
  - 9:   **for** each  $c$  in  $N_{I_t}(c_t)$  **do**
  - 10:     Set  $\sigma_{I_t,t}(c) = \sigma_{I_t,t-1}(c) + r_{I_t,t}(c)$ .
  - 11:   **end for**
  - 12:   Set  $\tau_{I_t,t} = \tau_{I_t,t-1} + 1$ .
  - 13: **end for**
- 

452 Like UCB1.CL, our algorithm UCB1.P-CL for the partial cross-learning setting is a straightforward  
 453 modification of UCB where we simply update all the means that we can every round (that is, we  
 454 update the means of every outgoing edge in the graph  $G_i$ ). To analyze the regret of this algorithm, let  
 455  $\bar{\kappa} = \frac{1}{K} \sum_{i \in [K]} \kappa(G_i)$  be the average clique cover size of all graphs  $G_i$ . We then claim that algorithm  
 456 UCB1.P-CL incurs at most  $O(\sqrt{\bar{\kappa}KT \log K})$  regret.

457 **Theorem 14.** UCB1.P-CL (Algorithm 3) has regret  $O(\sqrt{\bar{\kappa}KT \log K})$  for the contextual bandits  
 458 problem with partial cross-learning when rewards are stochastic.

459 *Proof.* We proceed similarly to the proof of Theorem 1 (and borrow all notation defined in this proof).  
 460 As before, we have that

$$\text{Reg}(\mathcal{A}) \leq \Delta_{\min} T + \sum_{i=1}^K \sum_{c=1}^C \sum_{t=1}^T \Delta_i(c) \mathbb{1}(I_t = i, c_t = c, \Delta_i(c) \geq \Delta_{\min}), \quad (7)$$

461 and would like to bound the expectation of this latter sum. To do so, we again divide it into two parts  
 462 ( $\text{Reg}_{PRE}$  and  $\text{Reg}_{POST}$ ), but we define these parts differently as in the proof of Theorem 1. Recall  
 463 that  $\tau_{i,t}(c)$  equals the number of times arm  $i$  has been pulled in context  $c$  up to (and including) round  
 464  $t$ . Define

$$\tau'_{i,t}(c) = \sum_{c' \in P(c)} \tau_{i,t}(c').$$

465 Note that  $\tau'_{i,t}(c)$  is equal to the number of times up to round  $t$  we observe the reward of arm  $i$  in  
 466 context  $c$ . We now define

$$\text{Reg}_{PRE} = \sum_{i=1}^K \sum_{c=1}^C \sum_{t=1}^T \Delta_i(c) \mathbb{1}(I_t = i, c_t = c, \tau'_{i,t}(c) \leq m_i(c)),$$

467 and

$$\text{Reg}_{POST} = \sum_{i=1}^K \sum_{c=1}^C \sum_{t=1}^T \Delta_i(c) \mathbb{1}(I_t = i, c_t = c, \tau'_{i,t}(c) > m_i(c)).$$

468 We can then rewrite (7) as

$$\text{Reg}(\mathcal{A}) \leq \Delta_{\min} T + \text{Reg}_{PRE} + \text{Reg}_{POST}. \quad (8)$$

469 We proceed to bound  $\mathbb{E}[\text{Reg}_{PRE}]$  and  $\mathbb{E}[\text{Reg}_{POST}]$ .

**Lemma 15.**

$$\mathbb{E}[\text{Reg}_{PRE}] \leq \frac{16 \log T \left( \sum_{i=1}^K \kappa(G_i) \right)}{\Delta_{\min}}.$$

470 *Proof.* Fix an action  $i$ , and let  $S_1, S_2, \dots, S_{\kappa(G_i)}$  be a minimal clique covering of the graph  $G_i$ . Let  
471  $r(c)$  equal the value of  $r$  such that  $c \in S_r$ . For each  $r \in [\kappa(G_i)]$ , define

$$\tilde{\tau}_{i,t}(r) = \sum_{c \in S_r} \tau_{i,t}(c).$$

472 Note that for all  $c$ ,  $S_{r(c)} \subseteq P_i(c)$  (since  $S_{r(c)}$  is a clique, all contexts in  $S_{r(c)}$  have an edge leading to  
473  $c$ ). It follows that  $\tilde{\tau}_{i,t}(r(c)) \leq \tau'_{i,t}(c)$ . Now, define  $X(c)$  as

$$X(c) = \sum_{t=1}^T \mathbb{1}(c_t = c, I_t = i, \tilde{\tau}_{i,t}(r(c)) \leq m_i(c)).$$

474 Note that since  $\tilde{\tau}_{i,t}(r(c)) \leq \tau'_{i,t}(c)$ , it is true that

$$\mathbb{1}(c_t = c, I_t = i, \tilde{\tau}_{i,t}(r(c)) \leq m_i(c)) \geq \mathbb{1}(c_t = c, I_t = i, \tau'_{i,t}(c) \leq m_i(c)),$$

475 and therefore

$$\sum_{c=1}^C \sum_{t=1}^T \Delta_i(c) \mathbb{1}(I_t = i, c_t = c, \tau'_{i,t}(c) \leq m_i(c)) \leq \sum_{c=1}^C \Delta_i(c) X(c).$$

476 We will now repeat the argument in Lemma 2 (in the analysis of UCB1.CL) for each subclique  $S_r$ . Fix  
477 an  $r$ , and order the contexts in  $S_r$   $c_{(1)}, c_{(2)}, \dots, c_{(n)}$  so that  $\Delta_i(c_{(1)}) \geq \Delta_i(c_{(2)}) \geq \dots \geq \Delta_i(c_{(n)})$   
478 (and thus  $m_i(c_{(1)}) \leq m_i(c_{(2)}) \leq \dots \leq m_i(c_{(n)})$ ). From the ordering of the  $m_i(c_{(j)})$ , we have the  
479 following system of inequalities:

$$\begin{aligned} X(c_{(1)}) &\leq m_i(c_{(1)}) \\ X(c_{(1)}) + X(c_{(2)}) &\leq m_i(c_{(2)}) \\ &\vdots \\ X(c_{(1)}) + X(c_{(2)}) + \dots + X(c_{(n)}) &\leq m_i(c_{(n)}). \end{aligned} \quad (9)$$

480 Repeating the logic in Lemma 2, these inequalities imply that

$$\sum_{c \in S_r} \Delta_i(c) X(c) \leq \frac{16 \log T}{\Delta_{\min}}.$$

Therefore, summing over all  $r \in [\kappa(G_i)]$ , we have that

$$\sum_c \Delta_i(c) X(c) \leq \frac{16 \kappa(G_i) \log T}{\Delta_{\min}}.$$

Finally, summing over all actions  $i$ , we have that

$$\text{Reg}_{PRE} \leq \frac{16 \log T}{\Delta_{\min}} \left( \sum_{i=1}^K \kappa(G_i) \right).$$

□

We next proceed to bound the expected value of  $\text{Reg}_{POST}$ . Again, this follows from the standard analysis of UCB1.

**Lemma 16.**

$$\mathbb{E}[\text{Reg}_{POST}] \leq \frac{K \pi^2}{3}$$

*Proof.* The proof is identical to the proof of Lemma 3. □

Substituting the results of Lemmas 2 and 3 into (8), we obtain

$$\mathbb{E}[\text{Reg}(\mathcal{A})] \leq \Delta_{\min} T + \frac{16 K \bar{\kappa} \log T}{\Delta_{\min}} + \frac{K \pi^2}{3}.$$

Substituting in  $\Delta_{\min} = \sqrt{\bar{\kappa} K \log T / T}$ , it is straightforward to verify that  $\mathbb{E}[\text{Reg}(\mathcal{A})] \leq O(\sqrt{\bar{\kappa} K T \log T})$ , as desired. □

### 4.3 Adversarial rewards

---

**Algorithm 4**  $O(\sqrt{\bar{\nu} K T \log K})$  regret algorithm (EXP3.P-CL) for the contextual bandits problem with partial cross-learning where rewards are adversarial and contexts are stochastic.

---

- 1: Choose  $\alpha = \beta = \sqrt{\frac{\log K}{\bar{\nu} K T}}$  (where  $\bar{\nu} = \frac{1}{K} \sum_{i=1}^K \nu(G_i)$ ).
  - 2: Initialize  $K \cdot C$  weights, one for each pair of action  $i$  and context  $c$ , letting  $w_{i,t}(c)$  be the value of the  $i$ th weight for context  $c$  at round  $t$ . Initially, set all  $w_{i,0} = 1$ .
  - 3: **for**  $t = 1$  to  $T$  **do**
  - 4:   Draw context  $c_t$  from  $\mathcal{D}$ .
  - 5:   For all  $i \in [K]$  and  $c \in [C]$ , let  $p_{i,t}(c) = (1 - K\alpha) \frac{w_{i,t-1}(c)}{\sum_{j=1}^K w_{j,t-1}(c)} + \alpha$ .
  - 6:   Sample an arm  $I_t$  from the distribution  $p_t(c_t)$ .
  - 7:   Pull arm  $I_t$ , receiving reward  $r_{I_t,t}(c_t)$ , and learning the value of  $r_{I_t,t}(c)$  for all  $c \in N_i(c_t)$ .
  - 8:   **for** each  $c$  in  $N_i(c_t)$  **do**
  - 9:     Set  $w_{I_t,t}(c) = w_{I_t,t-1}(c) \cdot \exp \left( \beta \cdot \frac{r_{I_t,t}(c)}{\sum_{c' \in P(c)} \Pr[c'] \cdot p_{I_t,t}(c')} \right)$ .
  - 10:   **end for**
  - 11: **end for**
- 

In this section we present an algorithm for contextual bandits with partial cross-learning when rewards are adversarial and contexts are stochastic. As with EXP3.CL, this comes down to constructing a low variance unbiased estimator  $\hat{r}_{i,t}(c)$  for this setting. Since we no longer learn the reward for all contexts  $c$ , we cannot use the estimator in EXP3.CL; instead we modify it to the following estimator:

$$\hat{r}_{i,t}(c) = \frac{r_{i,t}(c)}{\sum_{c' \in P_i(c)} \Pr[c'] \cdot p_{i,t}(c')} \mathbb{1}(I_t = i, c_t \in P_i(c)).$$

495 Let  $\bar{\lambda} = \frac{1}{K} \sum_{i \in [K]} \lambda(G_i)$  be the average size of the maximum acyclic subgraph over all graphs  $G_i$   
 496 (note that since  $\lambda(G) \leq \kappa(G)$  for all graphs  $G$  by Lemma 13,  $\bar{\lambda} \leq \bar{\kappa}$ ). We will show that EXP3.P-CL  
 497 obtains at most  $O(\sqrt{\bar{\lambda}KT})$  regret.

498 **Theorem 17.** UCB1.P-CL (Algorithm 4) has regret  $O(\sqrt{\bar{\lambda}KT \log K})$  for the contextual bandits  
 499 problem with partial cross-learning when rewards are stochastic.

500 *Proof.* The proof is similar to that of Theorem 23. If we define the estimator

$$\hat{r}_{i,t}(c) = \frac{r_{i,t}(c)}{\sum_{c' \in P_i(c)} \Pr[c'] \cdot p_{i,t}(c')} \mathbb{1}(I_t = i, c_t \in P_i(c)).$$

501 Note that

$$\Pr[I_t = i, c_t \in P(c)] = \sum_{c' \in P_i(c)} \Pr[c'] \cdot p_{i,t}(c'),$$

502 so taking expectations over history, we have that

$$\mathbb{E}[\hat{r}_{i,t}(c)] = r_{i,t}(c),$$

503 and

$$\mathbb{E}[\hat{r}_{i,t}(c)^2] = \frac{r_{i,t}(c)^2}{\sum_{c' \in P_i(c)} \Pr[c'] \cdot p_{i,t}(c')}.$$

504 Define  $W_t(c) = \sum_{i=1}^K w_{i,t}(c)$ . Now, proceeding in the same way as the proof of Theorem 23, we  
 505 arrive at the inequalities

$$\begin{aligned} \mathbb{E}[\text{Reg}(\mathcal{A})] &\leq \sum_{c=1}^C \Pr[c] \left( \frac{\log K}{\beta} + (e-2)\beta \sum_{t=1}^T \sum_{i=1}^K \mathbb{E} \left[ \frac{p_{i,t}(c)}{\sum_{c' \in P_i(c)} \Pr[c'] \cdot p_{i,t}(c')} \right] r_{i,t}(c)^2 + KT\alpha \right) \\ &= \frac{\log K}{\beta} + (e-2)\beta \sum_{t=1}^T \sum_{i=1}^K \sum_{c=1}^C \Pr[c] \cdot \mathbb{E} \left[ \frac{p_{i,t}(c)}{\sum_{c' \in P_i(c)} \Pr[c'] \cdot p_{i,t}(c')} \right] r_{i,t}(c)^2 + KT\alpha \\ &\leq \frac{\log K}{\beta} + (e-2)\beta \sum_{t=1}^T \sum_{i=1}^K \mathbb{E} \left[ \sum_{c=1}^C \frac{\Pr[c] p_{i,t}(c)}{\sum_{c' \in P_i(c)} \Pr[c'] \cdot p_{i,t}(c')} \right] + KT\alpha \\ &\leq \frac{\log K}{\beta} + (e-2)\beta \sum_{t=1}^T \sum_{i=1}^K \nu(G_i) + KT\alpha \\ &= \frac{\log K}{\beta} + (e-2)\beta \bar{\nu}KT + KT\alpha \\ &= O(\sqrt{\bar{\nu}KT \log K}). \end{aligned}$$

506 Here we use the fact that  $\sum_{c=1}^C \frac{\Pr[c] p_{i,t}(c)}{\sum_{c' \in P_i(c)} \Pr[c'] \cdot p_{i,t}(c')} \leq \lambda(G_i)$ , since from Lemma 12

$$\lambda(G_i) = \sup_{f: [C] \rightarrow \mathbb{R}^+} \sum_{c=1}^C \frac{f(c)}{\sum_{c' \in P_i(c)} f(c')},$$

507 and we can take  $f(c) = \Pr[c] \cdot p_{i,t}(c)$ . □



508 Note that this algorithm requires knowledge of both the distribution over contexts and the feedback  
 509 graphs  $G_i$  over contexts. It is an interesting question whether it is possible to get similar regret  
 510 bounds when the graphs  $G_i$  are unknown.

#### 511 4.4 Lower bounds

512 In this section we prove some lower bounds on regret for contextual bandits with partial cross-learning  
 513 that complement the results of the previous two sections. In our lower bounds, we will consider a  
 514 restricted set of instances where the graph  $G_i$  of each arm  $i$  is equal to the same graph  $G$ .

515 **Theorem 18.** *Any learning algorithm solving the contextual bandits problem with partial cross-*  
 516 *learning (for a fixed feedback graph  $G$ ) with stochastic rewards and stochastic contexts must incur*  
 517 *expected regret  $\Omega(\sqrt{\nu_2(G)KT})$ .*

518 *Proof.* To prove this, we will need a slightly stronger variant of Lemma 6.

519 **Lemma 19.** *There exists a distribution over instances of the multi-armed bandit problem (with  $K$*   
 520 *arms and  $T$  rounds) where for any round  $t \in [T]$ , any algorithm must incur an expected regret of at*  
 521 *least  $\Omega(\sqrt{K/T})$  in round  $t$ .*

522 *Proof.* See Appendix. □

523 Now, let  $f : [C] \rightarrow \mathbb{R}^+$  be any distribution on contexts (i.e.  $\sum_c f(c) = 1$ ). Define  $g(c) =$   
 524  $\sum_{c' \rightarrow c} f(c')$ . Consider the following distribution over instances of the contextual bandits problem  
 525 with partial cross-learning:

- 526 • Every round, the context  $c_t$  is drawn independently from the distribution  $f$ .
- 527 • The distribution of rewards for a context  $c$  is drawn from the distribution over hard instances
- 528 in Lemma 19 for a multi-armed bandit problem with  $K$  arms and  $g(c)T/2$  rounds.

529 Note that in the second point, the distribution over reward distributions changes per context depending  
 530 on  $g(c)$ . Intuitively, this is because we expect to observe (through cross-learning) the performance of  
 531 some action in context  $c$  in approximately  $g(c)T$  rounds.

532 For each context  $c$  and round  $t$ , let  $\tau_c(t) = \sum_{s=1}^t \mathbb{1}(c_s \in P(c))$  be the number of rounds up to round  
 533  $t$  where we observe the performance of some action in context  $c$ . Let  $T_c$  be the total number of rounds  
 534  $t$  where  $c_t = c$  and  $\tau_c(t) \leq g(c)T$ . We claim that we must incur regret at least

$$\Omega \left( \mathbb{E}[T_c] \sqrt{\frac{K}{g(c)T}} \right) \tag{10}$$

535 from the rounds where  $c_t = c$ . To see this, let  $\{t_1, t_2, \dots, t_{\min(\tau_c(T), g(c)T)}\}$  be the set of (the first  
 536  $g(c)T$ ) rounds where  $c_t \rightarrow c$ , and let  $S(c) = \{i | c_{t_i} = c\}$  be the subset of indices where  $c_{t_i}$  equals  $c$ .  
 537 We claim that, conditioned on  $S(c)$ , we must incur expected regret at least

$$\Omega \left( |S(c)| \sqrt{\frac{K}{g(c)T}} \right).$$

538 from the rounds  $t_i$  for  $i \in S$ . If not, this means that there is one  $i \in S(c)$  where the expected regret  
 539 from this round is  $o(\sqrt{K/(g(c)T)})$ ; but this would violate Lemma 19 (in particular, this gives a  
 540 regular multi-armed bandits algorithm which incurs expected regret  $o(\sqrt{K/(g(c)T)})$  in round  $i$ ).  
 541 Since  $|S_c| = T_c$ , taking expectations over  $T_c$ , equation (10) follows.

542 Now, we claim that  $\mathbb{E}[T_c] = \Omega(f(c)T)$ . This follows since

$$\begin{aligned}
\mathbb{E}[T_c] &= \sum_{i=1}^{g(c)T} \Pr[c_{t_i} = c_t] \cdot \Pr[\tau_c(T) \geq i] \\
&= \frac{f(c)}{g(c)} \sum_{i=1}^{g(c)T} \Pr[\tau_c(T) \geq i] \\
&\geq \frac{f(c)}{g(c)} (g(c)T/2) \cdot \Pr[\tau_c(T) \geq g(c)/2] \\
&\geq \frac{f(c)T}{2} \cdot (1 - \exp(-g(c)^2T/2)) \\
&\geq \Omega(f(c)T)
\end{aligned}$$

543 where in the last step, we use that  $(1 - \exp(-g(c)^2T/2)) \geq \Omega(1)$  for sufficiently large  $T$ .

544 This implies that the expected regret from rounds where  $c_t = c$  is at least  $\Omega(f(c)\sqrt{KT/g(c)})$ .  
545 Summing over all contexts  $c$ , the total expected regret is at least

$$\Omega\left(\left(\sum_{c=1}^C \frac{f(c)}{\sqrt{g(c)}}\right) \sqrt{KT}\right).$$

546 Since  $\nu_2(G) = \sup_f \left(\sum_{c=1}^C \frac{f(c)}{\sqrt{g(c)}}\right)^2$ , taking the supremum over  $f$  we find that any algorithm must  
547 incur expected regret at least  $\Omega(\sqrt{\nu_2(G)KT})$ , as desired.

548 □

549 When we allow the contexts to be adversarially chosen, we can improve this lower bound to  
550  $\Omega(\sqrt{\lambda(G)KT})$ .

551 **Theorem 20.** *Any learning algorithm solving the contextual bandits problem with partial cross-*  
552 *learning (for a fixed feedback graph  $G$ ) with stochastic rewards and adversarial contexts must incur*  
553 *regret  $\Omega(\sqrt{\lambda(G)KT})$ .*

554 *Proof.* Let  $\{v_1, v_2, \dots, v_{\lambda(G)}\}$  be a maximum acyclic subset of  $G$  (with the property that if  $i < j$ ,  
555 there is no edge  $v_i \rightarrow v_j$ ). We now proceed as in the proof of Theorem 7. Divide the  $T$  rounds into  
556  $\lambda(G)$  epochs of  $T/\lambda(G)$  rounds each. The adversary must decide both the contexts every round, and  
557 the reward distributions for each context. The adversary will do so as follows:

- 558 • For each round  $t$  in epoch  $i$ , the adversary will set the context  $c_t = v_i$ .
- 559 • For each context  $c$ , the adversary will set the reward distribution equal to a hard instance for  
560 the multi-armed bandit problem sampled from the distribution from Lemma 6.

561 Note that since the contexts  $v_i$  belong to an acyclic subset of  $G$ , any information cross-learned in  
562 epoch  $i$  will reveal nothing about the reward distribution for any context  $v_j$  with  $j > i$  (and hence  
563 nothing about the reward distribution in any epoch  $j > i$ ). Since the hard instances are all independent  
564 of each other, any algorithm for the contextual bandits problem with partial cross-learning which  
565 achieves  $o(\sqrt{\lambda(G)KT})$  expected regret on this instance must achieve  $o(\sqrt{KT/\lambda(G)})$  expected  
566 regret on one of the individual instances, which contradicts Lemma 6. □

567 Note that when the graphs are undirected,  $\lambda(G) = \iota(G)$  (since in that case, the definition of acyclic  
568 subgraph and independent set coincide), and therefore  $\lambda(G) = \nu_2(G) = \iota(G)$  (by Lemma 13). It  
569 follows that when all  $G_i$  are undirected and equal, the lower bound of Theorem 18 matches the upper  
570 bound of Theorem 17 in the setting where contexts are stochastic. Likewise, when  $G$  is the disjoint  
571 union of  $r$  cliques, all of our graph invariants coincide, and our lower bounds are tight. In other  
572 settings and for other feedback structures an instance-dependent gap between the best upper bound  
573 and best lower bound persists; reducing this gap is an interesting open problem.

## 5 Applications

In this section, we discuss how to apply our results on cross-learning to some of the settings mentioned in the introduction: learning to bid in a first-price auction, multi-armed bandits with exogenous costs, and sleeping bandits. In all cases, we show that the regret bound we obtain by applying the algorithms of Section 3 and Section 4 are optimal (up to  $\log T$  factors) and a non-trivial improvement over naively applying  $S$ -EXP3 or  $S$ -UCB (possibly discretizing the context space beforehand). We begin by discussing how to efficiently implement our algorithms when the number of contexts is infinite.

### 5.1 Cross-learning between infinitely many contexts

We begin with a brief note on efficiency. Even though the regret bounds we prove in Section 3 do not scale with  $C$ , note that the computational complexity of all three of our algorithms from Section 3 (EXP3.CL-U, EXP3.CL, and UCB1.CL) scales with the number of contexts  $C$ : all three algorithms have time complexity  $O(C + K)$  per round and space complexity  $O(CK)$ .

In many of the above settings, the number of contexts can be very large (in some cases, like when the space of contexts is the interval  $[0, 1]$ , the number of contexts is infinite). However, these settings often also have additional structure which let us run these same algorithms with improved complexity.

Most generally, for all the settings we consider, the observed reward is always an affine function of a straightforward embedding  $\rho(c)$  (computable by the learner) of the context into  $\mathbb{R}^d$  for some small  $d$ . That is, for each  $i$  and  $t$ , it is possible to write  $r_{i,t}(c) = a_{i,t}^\top \rho(c) + b_{i,t}$ , where  $a_{i,t} \in \mathbb{R}^d$  and  $b_{i,t} \in \mathbb{R}$ ; moreover, the coefficients  $a_{i,t}$  and  $b_{i,t}$  are directly revealed to the learner each round. It in turn follows that the averages  $\bar{r}_{i,t}(c)$  stored by UCB1.CL are simply linear functions of  $\rho(c)$ . Since there is one such function for each arm  $i$ , this requires a total of  $O(Kd)$  space (i.e., we simply store the running averages  $\bar{a}_{i,t}$  and  $\bar{b}_{i,t}$  and then determine the average reward using the formula  $\bar{r}_{i,t} = \bar{a}_{i,t}^\top \rho(c) + \bar{b}_{i,t}$ ). Similarly, the coefficients can be updated each round in  $O(d)$  time simply by updating the average for  $I_t$ . For example, for  $b_{i,t}$  the update is given by

$$\bar{b}_{I_t,t} = \frac{\tau_{I_t,t-1} \bar{b}_{I_t,t-1} + b_{I_t,t}}{\tau_{I_t,t-1} + 1}.$$

Likewise, the weights  $w_{i,t}(c)$  stored by EXP3.CL-U, for example, are always of the form  $\exp(x_{i,t} \rho(c) + y_{i,t})$ , and again it suffices to just maintain a linear function of  $\rho(c)$ . A similar argument shows that EXP3.CL can be implemented efficiently (with the caveat that to compute the estimators, we must be able to efficiently take expectations over our known distribution on contexts).

### 5.2 Applications of cross-learning

**Bidding in first-price auctions** In the problem of learning to bid in a first-price auction, every round  $t$  (for a total of  $T$  rounds) an item is put up for auction. This item has value  $v_t \in [0, 1]$  to our bidder. Based on  $v_t$ , our bidder submits a bid  $b_t \in [0, 1]$ . Simultaneously, other bidders submit bids for this item; we let  $h_t$  be the highest bid of the other bidders in the auction. Finally, if  $b_t \geq h_t$ , the buyer receives the item and pays  $b_t$ , obtaining an utility of  $v_t - b_t$ ; otherwise, the buyer does not receive the item and pays nothing, obtaining a utility of zero. The buyer only learns whether or not they receive the item and how much they pay – notably, they do not learn  $h_t$  (i.e. this is a non-transparent first price auction). The bidder’s goal is to maximize their total utility (total value of items received minus total payment) over the course of  $T$  rounds. We assume  $v_t$  and  $h_t$  are independently drawn each round from distributions  $\mathcal{D}_v$  and  $\mathcal{D}_h$  respectively, where both distributions are unknown to the bidder.

This can be thought of as a contextual bandits problem, where the contexts are values, the actions are bids, and the rewards are net utilities. Naively applying  $S$ -UCB to our problem by discretizing the value space and bid space into  $C$  and  $K$  pieces respectively results in a regret bound of  $\tilde{O}(\sqrt{CKT} + T/C + T/K)$  (here the last two terms come from discretization error). Optimizing  $C$  and  $K$ , we find that when  $C = K = T^{1/4}$ , we can achieve  $\tilde{O}(T^{3/4})$  regret in this way.

On the other hand, cross-learning between contexts is possible here (the reward  $r_{b_t,t}(v)$  is a known linear function of the value/context  $v$ ), so we can apply UCB1.CL. Doing this (after discretizing the

bid space into  $K$  pieces) results in a regret bound of  $\tilde{O}(\sqrt{KT} + T/K)$ , and optimizing this results in an algorithm which achieves  $\tilde{O}(T^{2/3})$  regret. It follows from a reduction to known results about dynamic pricing that any algorithm must incur  $\Omega(T^{2/3})$  regret when learning to bid (even when the value  $v$  is fixed) – see Appendix A.3 for details.

In the case of bidding in first-price auctions, the decision maker could potentially cross learn across auctions. For example, if the decision maker wins when submitting a bid  $b_t$ , then a higher bid  $b'$  would also win the auction and lead to an utility  $v_t - b'$ . Conversely, if the decision maker does not win, lower bids would necessarily lose in the auction too. While our algorithm does not explicitly take into account cross-learning across actions, the previous lower bound shows that, in the worst case, cross-learning across actions does not lead to lower regret. An interesting research direction is to design algorithms that exploit both cross-learning across actions and values when the problem has special structure that allows for cross-learning (e.g., the distribution of bids being nicely behaved).

Finally, we emphasize that our algorithms apply when the auctioneer runs other non-truthful auctions.

**Multi-armed bandits with exogenous costs** In this problem, as in the standard stochastic multi-armed bandit problem, a learner must repeatedly (for  $T$  rounds) make a choice between  $K$  options, where the reward  $r_{i,t} \in [0, 1]$  from choosing option  $i$  is drawn from some distribution  $\mathcal{D}_i$  with mean  $\mu_i$ . However, in addition to this, at the beginning of each round  $t$ , a cost  $s_{i,t} \in [0, 1]$  of playing arm  $i$  this round is adversarially chosen and publicly announced (and choosing arm  $i$  this round results in a net reward of  $r_{i,t} - s_{i,t}$ ). The learner’s goal is to get low regret compared to the optimal strategy, which always chooses the option which maximizes  $\mu_i - d_{i,t}$ .

This can be thought of as a contextual bandits problem where the context  $c_t$  is the cost vector  $s_t$ . Discretizing the context space  $[0, 1]^K$  into  $(1/\varepsilon)^K$  pieces and running  $S$ -UCB results in an overall regret bound of  $\tilde{O}(\sqrt{TK\varepsilon^{-K}} + \varepsilon T)$ . Optimizing this over  $\varepsilon$ , when  $\varepsilon = (K/T)^{1/(K+2)}$ , this results in a regret of  $\tilde{O}(T^{(K+1)/(K+2)} K^{1/(K+2)})$ .

Again, cross-learning between contexts is possible. Applying UCB1.CL, this immediately leads to an algorithm which achieves regret  $\tilde{O}(\sqrt{KT})$  (which is optimal since the standard stochastic multi-armed bandit problem is a special case of this problem).

**Sleeping bandits** In this variant of sleeping bandits, there are  $K$  arms (with stochastically generated rewards in  $[0, 1]$ ) and in each round some nonempty subset  $S_t$  of these arms are awake. The learner can play any arm and observe its reward, but only receives this reward if they play an awake arm. The learner would like to get low regret compared to the best policy (which always plays the awake arm whose distribution has the highest mean).

This is a contextual bandits problem where the context  $c_t$  is the set  $S_t$  of awake arms. Since there are  $2^K - 1$  possible contexts, naively applying  $S$ -UCB results in a regret bound of  $\tilde{O}(\sqrt{2^K KT})$ . On the other hand, cross-learning between contexts is again present in this setting: given the observation of the reward of arm  $i$ , one can infer the received reward for any context  $S'_t$  by just checking whether  $i \in S'_t$ . Applying UCB1.CL, this leads to an optimal  $\tilde{O}(\sqrt{KT})$  regret algorithm for this problem.

In the setting of sleeping bandits originally studied by Kleinberg, Niculescu-Mizi, and Sharma, ([16]) the learner can neither play nor observe sleeping arms. We can capture this setting via contextual bandits with partial cross-learning. We adjust the previous setting so that if a learner chooses an asleep arm, they receive zero reward and observe nothing else. Note that in this case, we have the following partial learning structure between contexts:

- If arm  $I_t \in S_t$ , you learn  $r_{I_t,t}(S)$  for all other subsets  $S$  (namely,  $r_{I_t,t}(S) = \mathbb{1}(I_t \in S)r_{I_t,t}(S_t)$ ).
- If arm  $I_t \notin S_t$ , you learn  $r_{I_t,t}(S)$  only subsets  $S$  where  $I_t \notin S$  (where  $r_{I_t,t}(S) = 0$ ).

In other words,  $G_i$  is the following graph: there is an edge from  $S_1 \rightarrow S_2$  if either  $i \in S_i$  or if  $i \notin S_1 \cup S_2$ . Note that  $G_i$  has clique cover number  $\kappa(G_i) = 2$ ; the set of subsets containing  $i$  and the set of subsets not containing  $i$  both form subcliques of  $G_i$ . It follows from Theorem 14 that running Algorithm 3 results in an optimal regret bound of  $\tilde{O}(\sqrt{KT})$ .

## 6 Empirical evaluation

In this section, we empirically evaluate the performance of our contextual bandit algorithms on the problem of learning how to bid in a first-price auction.

Recall that our cross-learning algorithms rely on cross-learning between contexts being possible: if the outcome of the auction remains the same, the bidder can compute their net utility they would receive given any value they could have for the item. This is true if the bidder’s value for the item is independent of the other bidders’ values for the item. Of course, this assumption (while common in much research in auction theory) does not necessarily hold in practice. We can nonetheless run our contextual bandit algorithms as if this were the case, and compare them to existing contextual bandit algorithms which do not make this assumption.

Our basic experimental setup is as follows. We take existing first-price auction data from a large ad exchange that runs first-price auctions on a significant fraction of traffic, remove one participant (whose true values we have access to), substitute in one of our bandit algorithms for this participant, and replay the auction, hence answering the question “how well would this (now removed) participant do if they instead ran this bandit algorithm?”.

We collected anonymized data from 10 million consecutive auctions from this ad exchange, which were then divided into 100 groups of  $10^5$  auctions. To remove outliers, bids and values above the 90% quantile were removed, and remaining bids/values were normalized to fit in the  $[0, 1]$  interval. We then replayed each group of  $10^5$  auctions, comparing the performance of our three algorithms with cross-learning (EXP3.CL-U, EXP3.CL, and UCB1.CL) and the performance of classic contextual bandits algorithms that take no advantage of cross-learning ( $S$ -EXP3, and  $S$ -UCB1). Since all algorithms require a discretized set of actions, allowable bids were discretized to multiples of 0.01. Parameters for each of these algorithms (including level of discretization of contexts for  $S$ -EXP3 and  $S$ -UCB1) were optimized via cross-validation on a separate data set of  $10^5$  auctions from the same ad exchange.

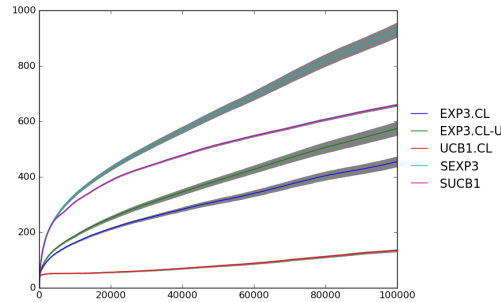

Figure 1: Graph of average cumulative regrets of various learning algorithms (y-axis) versus time (x-axis). Grey regions indicate 95% confidence intervals.

The results of this evaluation are summarized in Figure 1, which plots the average cumulative regret of these algorithms over the  $10^5$  rounds. The three algorithms which take advantage of cross-learning (EXP3.CL-U, EXP3.CL, and UCB1.CL) significantly outperform the two algorithms which do not ( $S$ -EXP3 and  $S$ -UCB1). Of these, EXP3.CL-U performs the worst, followed by EXP3.CL, followed by UCB1.CL, which vastly outperforms both EXP3.CL-U and EXP3.CL.

What is surprising about these results is that cross-learning works at all, let alone gives an advantage, given that the basic assumption necessary for cross-learning – that your values are independent from other players’ bids, so that you can predict what would have happened if your value was different – does not hold. Indeed, for this data, the Pearson correlation coefficient between the values  $v$  and the maximum bids  $r$  of the other bidders is approximately 0.4. This suggests that these algorithms are somewhat robust to errors in the cross-learning hypothesis. It is an interesting open question to understand this phenomenon theoretically.

## References

- [1] Noga Alon, Nicolo Cesa-Bianchi, Ofer Dekel, and Tomer Koren. Online learning with feedback graphs: Beyond bandits. In *Conference on Learning Theory*, pages 23–35, 2015.
- [2] Noga Alon, Nicolo Cesa-Bianchi, Claudio Gentile, Shie Mannor, Yishay Mansour, and Ohad Shamir. Nonstochastic multi-armed bandits with graph-structured feedback. *SIAM Journal on Computing*, 46(6):1785–1826, 2017.
- [3] Jean-Yves Audibert and Sébastien Bubeck. Best arm identification in multi-armed bandits. In *COLT-23th Conference on learning theory-2010*, pages 13–p, 2010.
- [4] Peter Auer, Nicolò Cesa-Bianchi, Yoav Freund, and Robert E. Schapire. The nonstochastic multiarmed bandit problem. *SIAM J. Comput.*, 32(1):48–77, January 2003.
- [5] Alina Beygelzimer, John Langford, Lihong Li, Lev Reyzin, and Robert Schapire. Contextual bandit algorithms with supervised learning guarantees. In *Proceedings of the Fourteenth International Conference on Artificial Intelligence and Statistics*, pages 19–26, 2011.
- [6] Mark Braverman, Jieming Mao, Jon Schneider, and S Matthew Weinberg. Selling to a no-regret buyer. *arXiv preprint arXiv:1711.09176*, 2017.
- [7] Sébastien Bubeck and Nicolò Cesa-Bianchi. Regret analysis of stochastic and nonstochastic multi-armed bandit problems. *Foundations and Trends in Machine Learning*, 5(1):1–122, 2012.
- [8] Yang Cai and Constantinos Daskalakis. Learning multi-item auctions with (or without) samples. In *FOCS*, 2017.
- [9] Arnoud V. den Boer. Dynamic pricing and learning: Historical origins, current research, and new directions. *Surveys in Operations Research and Management Science*, 20(1):1 – 18, 2015.
- [10] Miroslav Dudík, Nika Haghtalab, Haipeng Luo, Robert E. Schapire, Vasilis Syrgkanis, and Jennifer Wortman Vaughan. Oracle-efficient learning and auction design. In *FOCS*, 2017.
- [11] Zhe Feng, Chara Podimata, and Vasilis Syrgkanis. Learning to bid without knowing your value. In *Proceedings of the 2018 ACM Conference on Economics and Computation*, pages 505–522. ACM, 2018.
- [12] Negin Golrezaei, Adel Javanmard, and Vahab Mirrokni. Dynamic incentive-aware learning: Robust pricing in contextual auctions. 2018.
- [13] Jason Hartline, Vasilis Syrgkanis, and Eva Tardos. No-regret learning in bayesian games. In *Advances in Neural Information Processing Systems*, pages 3061–3069, 2015.
- [14] Satyen Kale, Lev Reyzin, and Robert E Schapire. Non-stochastic bandit slate problems. In *Advances in Neural Information Processing Systems*, pages 1054–1062, 2010.
- [15] Robert Kleinberg and Tom Leighton. The value of knowing a demand curve: Bounds on regret for online posted-price auctions. In *Foundations of Computer Science, 2003. Proceedings. 44th Annual IEEE Symposium on*, pages 594–605. IEEE, 2003.
- [16] Robert Kleinberg, Alexandru Niculescu-Mizil, and Yogeshwer Sharma. Regret bounds for sleeping experts and bandits. *Machine learning*, 80(2-3):245–272, 2010.
- [17] T.L Lai and Herbert Robbins. Asymptotically efficient adaptive allocation rules. *Adv. Appl. Math.*, 6(1):4–22, March 1985.
- [18] John Langford and Tong Zhang. The epoch-greedy algorithm for multi-armed bandits with side information. In J. C. Platt, D. Koller, Y. Singer, and S. T. Roweis, editors, *Advances in Neural Information Processing Systems 20*, pages 817–824. Curran Associates, Inc., 2008.
- [19] Lihong Li, Wei Chu, John Langford, and Robert E Schapire. A contextual-bandit approach to personalized news article recommendation. In *Proceedings of the 19th international conference on World wide web*, pages 661–670. ACM, 2010.

- [20] Shie Mannor and Ohad Shamir. From bandits to experts: On the value of side-observations. In *Advances in Neural Information Processing Systems*, pages 684–692, 2011.
- [21] Mehryar Mohri and Andrés Muñoz Medina. Learning algorithms for second-price auctions with reserve. *The Journal of Machine Learning Research*, 17(1):2632–2656, 2016.
- [22] Jamie Morgenstern and Tim Roughgarden. Learning simple auctions. In Vitaly Feldman, Alexander Rakhlin, and Ohad Shamir, editors, *29th Annual Conference on Learning Theory*, volume 49 of *Proceedings of Machine Learning Research*, pages 1298–1318, Columbia University, New York, New York, USA, 23–26 Jun 2016. PMLR.
- [23] Herbert Robbins. Some aspects of the sequential design of experiments. *Bulletin of the American Mathematical Society*, 58(5):527–535, 1952.
- [24] Aleksandrs Slivkins. Contextual bandits with similarity information. In *Proceedings of the 24th annual Conference On Learning Theory*, pages 679–702, 2011.
- [25] William Vickrey. Counterspeculation, auctions, and competitive sealed tenders. *The Journal of Finance*, 16(1):8–37, 1961.
- [26] Sofía S Villar, Jack Bowden, and James Wason. Multi-armed bandit models for the optimal design of clinical trials: benefits and challenges. *Statistical science: a review journal of the Institute of Mathematical Statistics*, 30(2):199, 2015.
- [27] Jonathan Weed, Vianney Perchet, and Philippe Rigollet. Online learning in repeated auctions. In *Conference on Learning Theory*, pages 1562–1583, 2016.

## A Appendix

### A.1 Regret in contextual bandits

We define the regret of an algorithm  $A$  in the contextual setting as the difference between the performance of our algorithm and the performance of the best stationary strategy  $\pi$ . In other words,

$$\text{Reg}(A) = \sum_{t=1}^T r_{\pi(c_t),t}(c_t) - \sum_{t=1}^T r_{I_t,t}(c_t).$$

However, when contexts are stochastic, there are two different natural ways to define “the best stationary strategy”  $\pi$ . The first maximizes the reward of this strategy for the specific contexts  $c_t$  we observed in our run of algorithm  $A$ :

$$\pi(c) = \arg \max_i \sum_{t=1}^T r_{i,t}(c) \mathbb{1}_{c_t=c}$$

The second way simply maximizes the reward of this strategy in expectation over all time:

$$\pi'(c) = \arg \max_i \sum_{t=1}^T r_{i,t}(c)$$

These two stationary strategies give rise to two different definitions of regret. We call the regret against strategy  $\pi$  the *ex post regret*  $\text{Reg}_{\text{post}}(A)$  (and denote the associated strategy by  $\pi_{\text{post}}$ ), and we call the regret against strategy  $\pi'$  the *ex ante regret*,  $\text{Reg}_{\text{ante}}(A)$  (and denote the associated strategy by  $\pi_{\text{ante}}$ ). This captures the idea that to the adversary at the beginning of the game (who knows all the rewards, but not when each context will occur), the best stationary strategy in expectation is  $\pi_{\text{ante}}$ . On the other hand, after the game has finished, the best stationary strategy in hindsight is  $\pi_{\text{post}}$ .

In this paper, all bounds we show are for *ex ante regret* (unless otherwise stated, e.g. in Section 3.1). One reason for this is that, while it is possible to eliminate the dependence on  $C$  in the ex ante regret,

778 it is impossible to do so for the ex post regret. In particular, for a large enough number of different  
 779 contexts  $C$ , it is impossible to get ex post regret that is sublinear in  $T$ .

780 **Theorem 21.** *For any algorithm  $A$ , there is an instance of the contextual bandits problem with*  
 781 *cross-learning where  $\mathbb{E}[\text{Reg}_{\text{post}}(A)] \geq T/2$ .*

782 *Proof.* We will consider an instance of the problem where there are  $K = 2$  actions and  $C$  contexts,  
 783 where the distribution  $\mathcal{D}$  is uniform over all  $C$  contexts. We will choose  $C$  to be large enough so that  
 784 with high probability all the observed contexts  $c_t$  are distinct.

785 The adversary will assign rewards as follows. For each round  $t$  and context  $c$ , with probability  $1/2$  he  
 786 will set  $r_{1,t}(c) = 1$  and  $r_{2,t}(c) = 0$ , and with probability  $1/2$  he will set  $r_{1,t}(c) = 0$  and  $r_{2,t}(c) = 1$ .

787 Now consider the best strategy  $\pi_{\text{post}}$  in hindsight. Since each context only appears once, and since  
 788 there is always an arm with reward 1, for any context and any time,  $\pi_{\text{post}}$  will receive total reward  $T$ .  
 789 On the other hand, since each  $r_{i,t}$  is completely independent of the rewards from previous rounds,  
 790 the maximum expected reward any learning algorithm can guarantee is  $T/2$ . It follows that  $M$  must  
 791 have  $\text{Reg}_{\text{post}}(A)$  at least  $T/2$ .  $\square$

792 On the other hand, in many settings, the strategies  $\pi_{\text{post}}$  and  $\pi_{\text{ante}}$  agree with high probability,  
 793 and therefore the two notions of regret  $\text{Reg}_{\text{ante}}(A)$  and  $\text{Reg}_{\text{post}}(A)$  are similar in expectation. For  
 794 example, this occurs when each context occurs often enough.

795 **Theorem 22.** *For each context  $c$ , let  $\Delta_c = \min_{i \neq \pi_{\text{ante}}(c)} \frac{1}{T} \sum_t (r_{\pi_{\text{ante}}(c),t}(c) - r_{i,t}(c))$ , and let*  
 796  *$M = \min_c \Pr[c] \cdot \Delta_c$ . If  $M \geq \sqrt{2 \log(TCK)/T}$ , then  $|\mathbb{E}[\text{Reg}_{\text{ante}}(A)] - \mathbb{E}[\text{Reg}_{\text{post}}(A)]| \leq 1$ .*

797 *Proof.* We will show that the probability that  $\pi_{\text{ante}} \neq \pi_{\text{post}}$  is at most  $\frac{1}{T}$ , from which the result  
 798 follows.

799 Fix a context  $c$ , and consider the probability that  $\pi_{\text{post}}(c) = i \neq \pi_{\text{ante}}(c)$ . For this to happen, it must  
 800 be the case that

$$\sum_{t=1}^T (r_{\pi_{\text{ante}}(c),t}(c) - r_{i,t}(c)) \mathbb{1}_{c_t=c} < 0.$$

801 Since each  $\mathbb{1}_{c_t=c}$  is an independent Bernoulli random variable with probability  $\Pr[c]$ , we have

$$\begin{aligned} \mathbb{E}_{\mathcal{D}} \left[ \sum_{t=1}^T (r_{\pi_{\text{ante}}(c),t}(c) - r_{i,t}(c)) \mathbb{1}_{c_t=c} < 0 \right] &= \Pr[c] \sum_{t=1}^T (r_{\pi_{\text{ante}}(c),t}(c) - r_{i,t}(c)) \\ &\leq -\Pr[c] \Delta_c \\ &\leq -M, \end{aligned}$$

802 It follows from Hoeffding's inequality (and our assumption that  $M \geq \sqrt{2T \log(TCK)}$ ) that

$$\Pr \left[ \sum_{t=1}^T (r_{\pi_{\text{ante}}(c),t}(c) - r_{i,t}(c)) \mathbb{1}_{c_t=c} < 0 \right] \leq \exp \left( -\frac{A^2}{2T} \right) \leq \frac{1}{TCK}.$$

803 Taking the union bound over all alternate actions  $i$  and all possible contexts  $c$ , we find that  $\Pr[\pi_{\text{ante}} \neq$   
 804  $\pi_{\text{post}}] \leq \frac{1}{T}$ , as desired.  $\square$

805 Throughout the entire paper (unless otherwise specified) we work entirely with ex ante regret unless  
 806 otherwise specified, and suppress subscripts and write  $\text{Reg}_{\text{ante}}(A)$  as  $\text{Reg}(A)$  and  $\pi_{\text{ante}}(A)$  as  $\pi(A)$ .



## 807 A.2 EXP3.CL-U: Adversarial rewards, stochastic contexts with unknown distribution

808 In this section we present an  $\tilde{O}(K^{1/3}T^{2/3})$  regret algorithm for the contextual bandits problem with  
 809 cross-learning in the setting when rewards are adversarial and contexts are stochastic, but when the  
 810 learner does not know the distribution  $\mathcal{D}$  over contexts. We call this algorithm EXP3.CL-U (see  
 811 Algorithm 5).

---

**Algorithm 5**  $\tilde{O}(K^{1/3}T^{2/3})$  regret algorithm (EXP3.CL-U) for the contextual bandits problem with cross-learning when the distribution  $\mathcal{D}$  over contexts is unknown.

---

```

1: Choose  $\alpha = (\log K / K^2 T)^{1/3}$ , and  $\beta = \sqrt{\frac{\alpha \log K}{T}}$ .
2: Initialize  $K \cdot C$  weights, one for each pair of action  $i$  and context  $c$ , letting  $w_{i,t}(c)$  be the value
   of the  $i$ th weight for context  $c$  at round  $t$ . Initially, set all  $w_{i,0} = 1$ .
3: for  $t = 1$  to  $T$  do
4:   Observe context  $c_t \sim \mathcal{D}$ .
5:   For all  $i \in [K]$  and  $c \in [C]$ , let  $p_{i,t}(c) = (1 - K\alpha) \frac{w_{i,t-1}(c)}{\sum_{j=1}^K w_{j,t-1}(c)} + \alpha$ .
6:   Sample an arm  $I_t$  from the distribution  $p_t(c_t)$ .
7:   Pull arm  $I_t$ , receiving reward  $r_{I_t,t}(c_t)$ , and learning the value of  $r_{I_t,t}(c)$  for all  $c$ .
8:   for each  $c$  in  $[C]$  do
9:     Set  $w_{I_t,t}(c) = w_{I_t,t-1}(c) \cdot \exp\left(\beta \cdot \frac{r_{I_t,t}(c)}{p_{I_t,t}(c_t)}\right)$ .
10:  end for
11: end for

```

---

812 EXP3.CL-U is similar to  $S$ -EXP3, in that both algorithms maintain a weight for each action in  
 813 each context, and update the weights via multiplicative updates by an exponential of an unbiased  
 814 estimator of the reward. The main difference between these two algorithms is that while  $S$ -EXP3  
 815 only updates the weight of the chosen action for the current context (i.e.  $w_{I_t,t}(c_t)$ ), EXP3.CL-U uses  
 816 the information from cross-learning to update the weight of the chosen action for all contexts. More  
 817 formally, note that for EXP3  $\hat{r}_{i,t}(c) = (r_{i,t}(c)/p_{i,t}(c_t))\mathbb{1}(I_t = i)$  is an unbiased estimator (over the  
 818 algorithm's randomness) of the reward the adversary chooses from pulling arm  $i$  in context  $c$ , where  
 819  $p_{i,t}(c)$  is the probability the algorithm chooses action  $i$  in round  $t$  if the context is  $c$ . Each round,  
 820 EXP3.CL-U updates the weight  $w_{I_t,t}(c)$  by multiplying it  $\exp(\beta \hat{r}_{i,t}(c))$  (whereas  $S$ -EXP3 does this  
 821 only for  $w_{I_t,t}(c_t)$ ).

822 Why does EXP3.CL-U have regret of order  $T^{2/3}$  when the dependence on  $T$  in  $S$ -EXP3 is only of  
 823 order  $\sqrt{T}$ ? The answer lies in understanding how the variance of the unbiased estimator used affects  
 824 the regret bound of the algorithm. In the analysis of EXP3, one of the quantities in the regret bound  
 825 is the *total expected variance of the unbiased estimator*. In  $S$ -EXP3, this quantity takes the form

$$\sum_{t=1}^T p_{i,t}(c_t) \mathbb{E}[\hat{r}_{i,t}(c_t)^2] = \sum_{t=1}^T \frac{p_{i,t}(c_t)}{p_{i,t}(c_t)} \hat{r}_{i,t}(c_t)^2 = \sum_{t=1}^T \hat{r}_{i,t}(c_t)^2 \leq T.$$

826 However, in EXP3.CL-U (where the desired exploration distribution  $p_{i,t}(c)$  can differ from the  
 827 exploration distribution due to cross-learning), this quantity becomes

$$\sum_{t=1}^T p_{i,t}(c) \mathbb{E}[\hat{r}_{i,t}(c)^2] = \sum_{t=1}^T \frac{p_{i,t}(c)}{p_{i,t}(c_t)} \hat{r}_{i,t}(c)^2 \leq \frac{T}{\min p_{i,t}(c)}.$$

828 Optimizing  $\min p_{i,t}(c)$  (through selecting the parameter  $\alpha$ ) leads to an  $\tilde{O}(T^{2/3}K^{1/3})$  regret bound.

829 **Theorem 23.** EXP3.CL-U (Algorithm 5) has regret  $O(K^{1/3}T^{2/3}(\log K)^{1/3})$  for the contextual  
 830 bandits problem with cross-learning.

831 *Proof.* We proceed similarly to the analysis of EXP3. Begin by defining

$$\hat{r}_{i,t}(c) = \frac{r_{i,t}(c)}{p_{i,t}(c_t)} \mathbb{1}(I_t = i).$$

832 Note that since  $\Pr[I_t = i | c_t = c] = p_{i,t}(c_t)$ , the expectation<sup>2</sup>  $\mathbb{E}[\hat{r}_{i,t}(c)] = r_{i,t}(c)$  and thus  $\hat{r}_{i,t}(c)$  is  
 833 an unbiased estimator of  $r_{i,t}(c)$ . In addition, since  $p_{i,t}(c) \geq \alpha$ , we can bound the variance of  $\hat{r}_{i,t}(c)$   
 834 via

$$\mathbb{E}[\hat{r}_{i,t}(c)^2] = \frac{r_{i,t}(c)^2}{p_{i,t}(c_t)} \leq \frac{r_{i,t}(c)^2}{\alpha}. \quad (11)$$

835 Now, let  $W_t(c) = \sum_{i=1}^K w_{i,t}(c)$ . Note that

$$\begin{aligned} \frac{W_{t+1}(c)}{W_t(c)} &= \sum_{i=1}^K \frac{w_{i,t}(c)}{W_t(c)} \cdot e^{\beta \hat{r}_{i,t}(c)} \\ &= \sum_{i=1}^K \frac{p_{i,t}(c) - \alpha}{1 - K\alpha} e^{\beta \hat{r}_{i,t}(c)} \\ &\leq \frac{1}{1 - K\alpha} \sum_{i=1}^K (p_{i,t}(c) - \alpha) (1 + \beta \hat{r}_{i,t}(c) + (e - 2)\beta^2 \hat{r}_{i,t}(c)^2) \\ &\leq 1 + \frac{\beta}{1 - K\alpha} \sum_{i=1}^K p_{i,t}(c) \hat{r}_{i,t}(c) + \frac{(e - 2)\beta^2}{1 - K\alpha} \sum_{i=1}^K p_{i,t}(c) \hat{r}_{i,t}(c)^2, \end{aligned}$$

836 where the first equation holds because for any  $c \in [C]$ ,  $w_{i,t+1}(c) = w_{i,t}(c) \cdot e^{\beta \hat{r}_{i,t}(c)}$ , and the second  
 837 equation follows because  $p_{i,t}(c) = (1 - K\alpha) \frac{w_{i,t}(c)}{W_t(c)} + \alpha$ .

838 In the first inequality, we have used the fact that  $\beta \hat{r}_{i,t}(c) \leq \beta r_{i,t}(c)/\alpha \leq 1$  (since  $\beta/\alpha \leq 1$  for any  
 839 choice of  $T$  and  $K$ ), that  $e^x \leq 1 + x + (e - 2)x^2$  for  $x \in [0, 1]$ , and that all rewards  $r_{i,t}(c)$  are  
 840 bounded in  $[0, 1]$ . Now, using the fact that  $\log(1 + x) \leq x$ , we have that:

$$\log \frac{W_{t+1}(c)}{W_t(c)} \leq \frac{\beta}{1 - K\alpha} \sum_{i=1}^K p_{i,t}(c) \hat{r}_{i,t}(c) + \frac{(e - 2)\beta^2}{1 - K\alpha} \sum_{i=1}^K p_{i,t}(c) \hat{r}_{i,t}(c)^2,$$

841 and therefore (summing over all  $t$ )

$$\log \frac{W_T(c)}{W_0(c)} \leq \frac{\beta}{1 - K\alpha} \sum_{t=1}^T \sum_{i=1}^K p_{i,t}(c) \hat{r}_{i,t}(c) + \frac{(e - 2)\beta^2}{1 - K\alpha} \sum_{t=1}^T \sum_{i=1}^K p_{i,t}(c) \hat{r}_{i,t}(c)^2. \quad (12)$$

842 Recall that we compute regret against the optimal stationary policy  $\pi(c) = \arg \max_i \sum_{t=1}^T r_{i,t}(c)$ .  
 843 Then,

$$\begin{aligned} \log \frac{W_T(c)}{W_0(c)} &\geq \log \frac{w_{\pi(c),T}(c)}{K} \\ &= \beta \sum_{t=1}^T \hat{r}_{\pi(c),t}(c) - \log K, \end{aligned} \quad (13)$$

---

<sup>2</sup>Unless otherwise specified, all expectations of quantities at time  $t$  are taken conditioned on the history of the previous  $t - 1$  rounds.

844 where the first inequality holds because (i)  $w_{i,0}(c) = 1$  for any  $i \in [K]$  and as a result,  $W_0(c) = K$ ,  
845 and (ii)  $W_T(c) = \sum_{i=1}^K w_{i,T}(c) \geq w_{\pi(c),T}(c)$ . From (12) and (13), we get

$$\frac{\beta}{1-K\alpha} \sum_{t=1}^T \sum_{i=1}^K p_{i,t}(c) \hat{r}_{i,t}(c) + \frac{(e-2)\beta^2}{1-K\alpha} \sum_{t=1}^T \sum_{i=1}^K p_{i,t}(c) \hat{r}_{i,t}(c)^2 \geq \beta \sum_{t=1}^T \hat{r}_{\pi(c),t}(c) - \log K. \quad (14)$$

846 Simplifying (14) (multiplying through by  $(1-K\alpha)/\beta^3$  and applying the fact that  $r_{i,t}(c)$  is bounded),  
847 this becomes

$$\sum_{t=1}^T \hat{r}_{\pi(c),t}(c) - \sum_{t=1}^T \sum_{i=1}^K p_{i,t}(c) \hat{r}_{i,t}(c) \leq \frac{\log K}{\beta} + (e-2)\beta \sum_{t=1}^T \sum_{i=1}^K p_{i,t}(c) \hat{r}_{i,t}(c)^2 + KT\alpha. \quad (15)$$

848 We now take expectations (with respect to all randomness, both of the algorithm and of the contexts)  
849 of both sides of (14) and apply our bound (11) on the variance of  $\hat{r}_{i,t}(c)$ .

$$\begin{aligned} \sum_{t=1}^T r_{\pi(c),t}(c) - \sum_{t=1}^T \sum_{i=1}^K \mathbb{E}[p_{i,t}(c)] r_{i,t}(c) &\leq \frac{\log K}{\beta} + (e-2)\beta \sum_{t=1}^T \sum_{i=1}^K \frac{\mathbb{E}[p_{i,t}(c)]}{\alpha} r_{i,t}(c)^2 + KT\alpha \\ &\leq \frac{\log K}{\beta} + (e-2) \frac{\beta T}{\alpha} + KT\alpha \\ &\leq O(K^{1/3} T^{2/3} (\log K)^{1/3}) \end{aligned} \quad (16)$$

850 where this last inequality follows from the definition of  $\alpha$  and  $\beta$ .

851 Now, note that the expected regret  $\mathbb{E}[\text{Reg}(\mathcal{A})]$  of our algorithm is equal to

$$\begin{aligned} \mathbb{E}[\text{Reg}(\mathcal{A})] &= \mathbb{E} \left[ \sum_{t=1}^T r_{\pi(c_t),t}(c_t) - \sum_{t=1}^T r_{I_t(c_t),t}(c_t) \right] \\ &= \sum_{t=1}^T \mathbb{E} [r_{\pi(c_t),t}(c_t) - r_{I_t(c_t),t}(c_t)] \\ &= \sum_{t=1}^T \sum_{c=1}^C \Pr[c] \mathbb{E} [r_{\pi(c),t}(c) - r_{I_t(c),t}(c)] \\ &= \sum_{t=1}^T \sum_{c=1}^C \Pr[c] (r_{\pi(c),t}(c) - \mathbb{E} [r_{I_t(c),t}(c)]) \end{aligned}$$

852 Considering the fact arm that  $I_t$  is drawn from distribution  $p_t(c)$ , we get

$$\begin{aligned} \mathbb{E}[\text{Reg}(\mathcal{A})] &= \sum_{t=1}^T \sum_{c=1}^C \Pr[c] \left( r_{\pi(c),t}(c) - \sum_{i=1}^K \mathbb{E}[p_{i,t}(c)] r_{i,t}(c) \right) \\ &= \sum_{c=1}^C \Pr[c] \left( \sum_{t=1}^T r_{\pi(c),t}(c) - \sum_{t=1}^T \sum_{i=1}^K \mathbb{E}[p_{i,t}(c)] r_{i,t}(c) \right) \\ &\leq \sum_{c=1}^C \Pr[c] \cdot O(K^{1/3} T^{2/3} (\log K)^{1/3}) \\ &= O(K^{1/3} T^{2/3} (\log K)^{1/3}), \end{aligned}$$

853 where the inequality follows from (16).

854

□

---

<sup>3</sup>Note that for  $T \geq K \log K$ ,  $\alpha \leq 1/K$ , so  $1 - K\alpha$  is always positive.

### A.3 Lower bound for learning to bid

In this section, will show that any algorithm for learning to bid in a first-price auction must incur at least  $\Omega(T^{2/3})$  regret even if there is only one value (so no potential for cross-learning between contexts). To show this, we will use a reduction to the problem of dynamic pricing.

The problem of dynamic pricing is as follows. You must repeatedly (for  $T$  rounds) sell an item to a buyer with value  $x_t$  drawn iid from some unknown distribution  $\mathcal{D}$ . You do this by proposing a price  $p_t$ . If  $x_t \geq p_t$ , the buyer buys the item and you receive payment  $p_t$  (alternatively, regret  $(x_t - p_t)$ ); otherwise if  $x_t < p_t$  the buyer does not buy the item and you receive regret  $x_t$ . The goal of this game is to maximize total revenue, or equivalently, minimize the total regret (with respect to the optimal fixed price  $p^*$ ).

Kleinberg and Leighton [15] prove the following bounds on this problem.

**Theorem 24** (Theorem 4.3 in [15]). *For any  $T$ , there exists a family of distributions  $\mathcal{P} = \{\mathcal{D}_i\}$  on  $[0, 1]$  such that if  $\mathcal{D}$  is sampled uniformly from  $\mathcal{P}$  and the buyer's valuations are sampled iid according to  $\mathcal{D}$ , any pricing strategy must incur expected regret  $\Omega(T^{2/3})$ .*

This lower bound can be matched (up to log factors) by discretizing (to  $K = O(T^{1/3})$  intervals) and running EXP3.

We now show this lower bound immediately implies a lower bound on the learning to bid problem, even when there is only one context.

**Theorem 25.** *Any algorithm must incur  $\Omega(T^{2/3})$  regret for the learning to bid in first price auctions problem, even if the value of the bidder is fixed (i.e. there is only one context).*

*Proof.* We will show how to use a learning algorithm for the learning to bid problem to solve the dynamic pricing problem.

Consider an instance of the learning to bid problem where  $v_t = 1$  always (i.e.  $\mathcal{D}_v$  is the singleton distribution supported on 1). If the bidder bids  $b_t$  in this auction, then with probability  $\Pr_{h \sim \mathcal{D}_h}[b_t \geq h]$  the bidder wins the auction and receives reward  $(1 - b_t)$ , and with probability  $1 - P_t$  the bidder loses the auction and receives reward 0.

Now consider pricing when the value of the buyer is drawn from  $\mathcal{D} = 1 - \mathcal{D}_h$  (that is, one can sample from  $\mathcal{D}$  by sampling  $x$  from  $\mathcal{D}_h$  and returning  $1 - x$ ). If set a price  $p_t$  in this auction, then with probability  $\Pr_{x \sim \mathcal{D}}[x \geq p_t]$ , the item is sold and the seller receives reward  $p_t$ , and with probability  $1 - \Pr_{x \sim \mathcal{D}}[x \geq p_t]$ , the item is not sold and the seller receives reward 0.

But note that  $\Pr_{x \sim \mathcal{D}}[x \geq p_t] = \Pr_{h \sim \mathcal{D}_h}[1 - h \geq p_t] = \Pr_{h \sim \mathcal{D}_h}[1 - p_t \geq h]$ . In particular, setting a price of  $p_t$  in the pricing problem with distribution  $1 - \mathcal{D}_h$  results in the exact same feedback and rewards as bidding  $1 - p_t$  in the learning to bid problem with distribution  $\mathcal{D}_h$ . One can therefore use any algorithm for the learning to bid problem to solve the dynamic pricing problem with the same regret guarantee; since Theorem 24 implies any learning algorithm must incur  $\Omega(T^{2/3})$  regret on the dynamic pricing problem, it follows that any learning algorithm must incur  $\Omega(T^{2/3})$  regret for the learning to bid problem.  $\square$

### A.4 Omitted proofs

#### A.4.1 Proof of Lemma 3

*Proof of Lemma 3.* Essentially, we must show that after observing arm  $i$   $m_i(c)$  times, we no longer lose substantial regret from that arm in context  $c$ . Begin by noting that

$$\begin{aligned} \sum_{i=1}^K \sum_{c=1}^C \sum_{t=1}^T \Delta_i(c) \mathbb{1}(I_t = i, c_t = c, \tau_{i,t} > m_i(c)) &\leq \sum_{i=1}^K \sum_{c=1}^C \sum_{t=1}^T \mathbb{1}(I_t = i, c_t = c, \tau_{i,t} > m_i(c)) \\ &= \sum_{i=1}^K \sum_{t=1}^T \mathbb{1}(I_t = i, \tau_{i,t} > m_i(c_t)), \end{aligned}$$

896 where the inequality holds the reward of each arm  $i$  and consequently gap  $\Delta_i(c)$  is bounded in  $[0, 1]$ .

897 In expectation, this is equal to

$$\sum_{i=1}^K \sum_{t=1}^T \Pr[I_t = i, \tau_{i,t} > m_i(c_t)].$$

898 Now, define  $U_{i,t}(c) = \bar{r}_{i,t}(c) + \omega(\tau_{i,t})$  to be the upper confidence bound for arm  $i$  under context  $c$  in  
 899 round  $t$ . Note that if  $I_t = i$ , then  $U_{i,t-1}(c_t) \geq U_{j,t-1}(c_t)$  for any other arm  $j$ . This holds because the  
 900 algorithm chooses the arm with the highest upper confidence bound. It follows that (fixing  $i$  and  $t$ )

$$\Pr[I_t = i, \tau_{i,t} > m_i(c_t)] \leq \Pr[U_{i,t-1}(c_t) \geq U_{i^*(c_t),t-1}(c_t), \tau_{i,t} > m_i(c_t)].$$

901 Define  $t_i(n)$  to be the minimum round  $t$  such that  $\tau_{i,t} = n$ , and define  $\bar{x}_{i,n}(c) = \bar{r}_{i,t_i(n)}(c)$  (in other  
 902 words,  $\bar{x}_{i,n}(c)$  is the average value of the first  $n$  rewards from arm  $i$ , in context  $c$ ). Note that if  
 903  $\tau_{i,t} \geq m_i(c)$ , then  $U_{i,t-1}(c) \geq U_{i^*(c),t-1}(c)$  implies that

$$\max_{m_i(c_t) \leq n \leq t} \bar{x}_{i,n}(c) + \omega(n) \geq \min_{0 < n' < t} \bar{x}_{i^*(c_t),n'}(c) + \omega(n').$$

904 We can therefore write

$$\begin{aligned} & \Pr[U_{i,t-1}(c_t) \geq U_{i^*(c_t),t-1}(c_t), \tau_{i,t} > m_i(c_t)] \\ & \leq \Pr \left[ \max_{m_i(c_t) \leq n \leq t} \bar{x}_{i,n}(c_t) + \omega(n) \geq \min_{0 < n' < t} \bar{x}_{i^*(c_t),n'}(c_t) + \omega(n') \right] \\ & \leq \sum_{n=m_i(c_t)}^t \sum_{n'=1}^t \Pr[\bar{x}_{i,n}(c_t) + \omega(n) \geq \bar{x}_{i^*(c_t),n'}(c_t) + \omega(n')]. \end{aligned}$$

905 Finally, observe that if  $\bar{x}_{i,n}(c_t) + \omega(n) \geq \bar{x}_{i^*(c_t),n'}(c_t) + \omega(n')$ , then one of the following events  
 906 must occur:

- 907 1.  $\bar{x}_{i^*(c_t),n'}(c_t) \leq \mu^*(c_t) - \omega(n')$ .
- 908 2.  $\bar{x}_{i,n}(c_t) \geq \mu_i(c_t) + \omega(n)$ .
- 909 3.  $\mu^*(c_t) < \mu_i(c_t) + 2\omega(n)$ .

910 Now, recall that  $m_i(c) = \frac{8 \log T}{\Delta_i(c)^2}$ . Note that since  $n \geq m_i(c_t)$ , we have that  $\omega(n) \leq \omega(m_i(c_t)) \leq$   
 911  $\Delta_i(c_t)/2$ , so  $\mu_i(c_t) + 2\omega(n) \leq \mu_i(c_t) + \Delta_i(c_t) \leq \mu^*(c_t)$ , and therefore the third event can never  
 912 occur. Since the first two events both occur with probability at most  $t^{-4}$  (by Hoeffding's inequality),  
 913 we have that

$$\begin{aligned} \Pr[I_t = i, \tau_{i,t} > m_i(c_t)] & \leq \sum_{n=m_i(c_t)}^t \sum_{n'=1}^t \Pr[\bar{x}_{i,n}(c_t) + \omega(n) \geq \bar{x}_{i^*(c_t),n'}(c_t) + \omega(n')] \\ & \leq \sum_{n=m_i(c_t)}^t \sum_{n'=1}^t 2t^{-4} \leq 2t^{-2}. \end{aligned}$$

914 Further summing this over all  $i \in [K]$  and  $t \in [T]$ , we have that

$$\sum_{i=1}^K \sum_{t=1}^T \Pr[I_t = i, \tau_{i,t} > m_i(c_t)] \leq \frac{K\pi^2}{3},$$

915

□

916 **A.4.2 Proof of Theorem 5**

917 *Proof of Theorem 5.* The proof is similar to that of Theorem 23. Begin by defining the estimator

$$\hat{r}_{i,t}(c) = \frac{r_{i,t}(c)}{\sum_{c'} \Pr[c'] \cdot p_{i,t}(c')} \cdot \mathbb{1}(I_t = i).$$

918 Note that

$$\Pr[I_t = i] = \sum_{c'} \Pr[c'] \cdot p_{i,t}(c'),$$

919 so taking expectations over the algorithm's choice of  $I_t$ , we have that

$$\mathbb{E}[\hat{r}_{i,t}(c)] = r_{i,t}(c),$$

920 and

$$\mathbb{E}[\hat{r}_{i,t}(c)^2] = \frac{r_{i,t}(c)^2}{\sum_{c'} \Pr[c'] \cdot p_{i,t}(c')}.$$

921 Define  $W_t(c) = \sum_{i=1}^K w_{i,t}(c)$ . Now, proceeding in the same way as the proof of Theorem 23, we  
922 arrive at the inequality

$$\sum_{t=1}^T \hat{r}_{\pi(c),t}(c) - \sum_{t=1}^T \sum_{i=1}^K p_{i,t}(c) \hat{r}_{i,t}(c) \leq \frac{\log K}{\beta} + (e-2)\beta \sum_{t=1}^T \sum_{i=1}^K p_{i,t}(c) \hat{r}_{i,t}(c)^2 + KT\alpha. \quad (17)$$

923 We now take expectations (with respect to all randomness, both of the algorithm and of the contexts)  
924 of both sides of (17).

$$\begin{aligned} & \sum_{t=1}^T r_{\pi(c),t}(c) - \sum_{t=1}^T \sum_{i=1}^K \mathbb{E}[p_{i,t}(c)] r_{i,t}(c) \\ & \leq \frac{\log K}{\beta} + (e-2)\beta \sum_{t=1}^T \sum_{i=1}^K \mathbb{E} \left[ \frac{p_{i,t}(c)}{\sum_{c'} \Pr[c'] \cdot p_{i,t}(c')} \right] r_{i,t}(c)^2 + KT\alpha. \end{aligned} \quad (18)$$

925 Note that the expected regret  $\mathbb{E}[\text{Reg}(\mathcal{A})]$  of our algorithm is equal to

$$\begin{aligned} \mathbb{E}[\text{Reg}(\mathcal{A})] &= \mathbb{E} \left[ \sum_{t=1}^T r_{\pi(c_t),t}(c_t) - \sum_{t=1}^T r_{I_t(c_t),t}(c_t) \right] \\ &= \sum_{t=1}^T \mathbb{E} [r_{\pi(c_t),t}(c_t) - r_{I_t(c_t),t}(c_t)] \\ &= \sum_{t=1}^T \sum_{c=1}^C \Pr[c] \mathbb{E} [r_{\pi(c),t}(c) - r_{I_t(c),t}(c)] \\ &= \sum_{t=1}^T \sum_{c=1}^C \Pr[c] (r_{\pi(c),t}(c) - \mathbb{E} [r_{I_t(c),t}(c)]) \end{aligned}$$

926 Since arm  $I_t$  is drawn from distribution  $p_t(c)$ , we have

$$\begin{aligned}\mathbb{E}[\text{Reg}(\mathcal{A})] &= \sum_{t=1}^T \sum_{c=1}^C \Pr[c] \left( r_{\pi(c),t}(c) - \sum_{i=1}^K \mathbb{E}[p_{i,t}(c)] r_{i,t}(c) \right) \\ &= \sum_c \Pr[c] \left( \sum_{t=1}^T r_{\pi(c),t}(c) - \sum_{t=1}^T \sum_{i=1}^K \mathbb{E}[p_{i,t}(c)] r_{i,t}(c) \right)\end{aligned}$$

927 From (18), we get that

$$\begin{aligned}\mathbb{E}[\text{Reg}(\mathcal{A})] &\leq \sum_{c=1}^C \Pr[c] \left( \frac{\log K}{\beta} + (e-2)\beta \sum_{t=1}^T \sum_{i=1}^K \mathbb{E} \left[ \frac{p_{i,t}(c)}{\sum_{c'} \Pr[c'] \cdot p_{i,t}(c')} \right] r_{i,t}(c)^2 + KT\alpha \right) \\ &= \frac{\log K}{\beta} + (e-2)\beta \sum_{t=1}^T \sum_{i=1}^K \sum_{c=1}^C \Pr[c] \cdot \mathbb{E} \left[ \frac{p_{i,t}(c)}{\sum_{c'} \Pr[c'] \cdot p_{i,t}(c')} \right] r_{i,t}(c)^2 + KT\alpha \\ &\leq \frac{\log K}{\beta} + (e-2)\beta KT + KT\alpha \\ &= O(\sqrt{KT \log K}).\end{aligned}$$

928 Here the final inequality holds since  $r_{i,t}(c)$  is bounded in  $[0, 1]$ .  $\square$

### 929 A.4.3 Proof of Lemma 19

930 *Proof of Lemma 19.* Consider the following distribution over instances of the multi-armed bandit  
931 problem. Let  $\varepsilon = \Theta(\sqrt{K/T})$  (the precise value to be chosen later). An  $i$  is drawn uniformly at  
932 random from  $[K]$ . The rewards from arm  $i$  are distributed according to  $B((1+\varepsilon)/2)$ , and the arms  
933 for all  $j \neq i$  are distributed according to  $B((1-\varepsilon)/2)$  (where here  $B(p)$  is the Bernoulli distribution  
934 with probability  $p$ ).

935 We wish to claim that at any round  $t \leq T$ , the probability any learner plays the optimal arm  $i$  is less  
936 than  $1/2$ , and therefore the learner must incur  $\Omega(\varepsilon) = \Omega(\sqrt{K/T})$  regret this round. This is therefore  
937 a best-arm identification problem. Theorem 4 in [3] implies there exists some  $\varepsilon = \Theta(\sqrt{K/T})$  such  
938 that this result holds for our distribution of instances.  $\square$
